# Supplementary material for: Mutual Placement of Isocyanide and Phosphine Ligands in Platinum(II) Complexes [PtHal2L1L2] (Hal = Cl, Br, I; L1,L2 = CNCy, PPh3) Leads to Highly-Efficient Photocatalysts for Hydrosilylation of Alkynes
Source: MDPI journal article supplement (doi:10.3390/molecules28237764), 2023-11-24
Supplement: s1 [file s1]

# Mutual Placement of Isocyanide and Phosphine Ligands in Platinum(II) Complexes [PtHal<sub>2</sub>L<sup>1</sup>L<sup>2</sup>] (Hal = Cl, Br, I; L<sup>1</sup>, L<sup>2</sup> = CNCy, PPh<sub>3</sub>) Leads to Highly-Efficient Photocatalysts for Hydrosilylation of Alkynes

Maria V. Kashina <sup>1</sup>, Andrei A. Karcheuski <sup>1</sup>, Mikhail A. Kinzhalov <sup>1</sup>, Konstantin V. Luzyanin <sup>2,\*</sup> and Svetlana A. Katkova <sup>1,\*</sup>

<sup>1</sup> Institute of Chemistry, St. Petersburg University, 7/9 Universitetskaya Emb., Saint Petersburg 199034, m.kinzhalov@spbu.ru (M.A.K.)

<sup>2</sup> Department of Chemistry, University of Liverpool, Crown Street, Liverpool L69 7SD, UK

\* Correspondence: konstantin.luzyanin@liverpool.ac.uk (K.V.L.); s.katkova@spbu.ru (S.A.K.)

## Table of content

|                                           |    |
|-------------------------------------------|----|
| S1. Preparation and Characterization..... | 3  |
| S2. X-ray diffraction studies .....       | 6  |
| S3. CCDC search. ....                     | 10 |
| S4. Theoretical studies.....              | 11 |
| S5. Catalytic investigations.....         | 25 |
| S6 UV/vis absorption spectra .....        | 27 |
| S7. NMR spectra .....                     | 29 |
| S8. FTIR spectra.....                     | 39 |
| S9. Mass spectra.....                     | 41 |
| References .....                          | 44 |

## S1. Preparation and Characterization.

The platinum(II) *bis*isocyanide and *bis*phosphine complexes (Table S1) were synthesized according to the previously published procedure [1-4]. While it is known that  $[\text{PtCl}_2(\text{PPh}_3)_2]$ ,  $[\text{PtBr}_2(\text{PPh}_3)_2]$  and  $[\text{PtI}_2(\text{PPh}_3)_2]$  can be prepared in the *cis* and *trans* isomers [3, 4], our investigation yielded the thermodynamic products *cis*- $[\text{PtCl}_2(\text{PPh}_3)_2]$  (**1**), *cis*- $[\text{PtBr}_2(\text{PPh}_3)_2]$  (**2**), and *trans*- $[\text{PtI}_2(\text{PPh}_3)_2]$  (**3**) through the methods previously described [3, 4]. As expected, the adding an equal amount of phosphine and isocyanide to a solution of *cis*- $[\text{PtCl}_2(\text{NC}^i\text{Et})_2]$  in 1,2-dichloroethane led to the formation of mixed-ligand phosphine-isocyanide complex  $[\text{PtCl}_2(\text{CNCy})(\text{PPh}_3)]$  (**4**) in yield of 87% as a single product. Additionally, **4** can be synthesized by combining equivalent quantities of **1** and **7** in  $\text{CH}_2\text{Cl}_2$  at room temperature with a quantitative yield. The subsequent treatment of **4** with KBr or KI in acetone resulted in the formation of species **5** and **6**, respectively, in excellent yields (91% for **5** and 85% for **6**). The  $[\text{PtCl}_2(\text{PR}'_3)(\text{CNR})]$  type complexes, in both solid phase and solution, display thermodynamic resistance towards *cis* to *trans* isomerisation and ligand disproportionation [5-7], therefore, the *cis* configuration was assigned to the complex **4**.

**Table S1.** The numbering scheme of prepared platinum(II) complexes used as catalysts in the hydrosilylation of alkynes.

| $[\text{PtX}_2\text{L}^1\text{L}^2]$ | $\text{L}^1 = \text{L}^2 = \text{PPh}_3$                     | $\text{L}^1 = \text{PPh}_3, \text{L}^2 = \text{CNCy}$                  | $\text{L}^1 = \text{L}^2 = \text{CNCy}$                     |
|--------------------------------------|--------------------------------------------------------------|------------------------------------------------------------------------|-------------------------------------------------------------|
| X = Cl                               | <i>cis</i> - $[\text{PtCl}_2(\text{PPh}_3)_2]$ ( <b>1</b> )  | <i>cis</i> - $[\text{PtCl}_2(\text{PPh}_3)(\text{CNCy})]$ ( <b>4</b> ) | <i>cis</i> - $[\text{PtCl}_2(\text{CNCy})_2]$ ( <b>7</b> )  |
| X = Br                               | <i>cis</i> - $[\text{PtBr}_2(\text{PPh}_3)_2]$ ( <b>2</b> )  | <i>cis</i> - $[\text{PtBr}_2(\text{PPh}_3)(\text{CNCy})]$ ( <b>5</b> ) | <i>cis</i> - $[\text{PtBr}_2(\text{CNCy})_2]$ ( <b>8</b> )  |
| X = I                                | <i>trans</i> - $[\text{PtI}_2(\text{PPh}_3)_2]$ ( <b>3</b> ) | <i>cis</i> - $[\text{PtI}_2(\text{PPh}_3)(\text{CNCy})]$ ( <b>6</b> )  | <i>trans</i> - $[\text{PtI}_2(\text{CNCy})_2]$ ( <b>9</b> ) |

The complex *cis*- $[\text{PtCl}_2(\text{CNCy})_2]$  (**7**) is not subject to isomerization and is pure *cis* in both solution and solid state [2]. The complex *cis*- $[\text{PtBr}_2(\text{CNCy})_2]$  (**8**) was prepared via a treatment of *cis*- $[\text{PtCl}_2(\text{CNCy})_2]$  (**7**) with excess KBr to in acetone in good yield (90%). In addition, the supplementation of phosphine to the complex *cis*- $[\text{PtBr}_2(\text{CNCy})_2]$  **8** haven't been resulted to the ligand exchange of isocyanide for phosphine.

The resulting compounds **1–9** are air- and moisture-stable at 20–200 °C and well soluble in common aprotic solvents (e.g.  $\text{CH}_2\text{Cl}_2$ ,  $\text{CHCl}_3$ , and MeCN). The prepared complexes are uncolored (**1**, **4**, **7**), yellowish (**2**, **5**, **8**) or yellow (**3**, **6**, **9**) solids. The new

species **4–6,8** were characterized by high-resolution ESI<sup>+</sup>-MS, IR, <sup>1</sup>H, <sup>13</sup>C{<sup>1</sup>H, <sup>31</sup>P}, <sup>195</sup>Pt{<sup>1</sup>H} and <sup>31</sup>P{<sup>1</sup>H} NMR spectroscopy. The species give satisfactory microanalyses that are consistent with the proposed formulations. In the HR ESI<sup>+</sup>-MS, the ions [M + Na]<sup>+</sup> with the characteristic isotopic distribution were detected. The *cis* structure of **8** can be confirmed by the presence of two stretching vibration at 2261 and 2233 cm<sup>-1</sup> due to  $\nu(\text{C}\equiv\text{N})$  in IR spectra suggesting the *cis*-position of the two isocyanide ligands, since IR spectra of **9** has only one vibration of  $\nu(\text{C}\equiv\text{N})$  at 2261 cm<sup>-1</sup> consequence of *trans*-orientation of CNCy ligands [8]. Meanwhile, the mixed-ligand **5** and **6** show only one  $\nu(\text{C}\equiv\text{N})$  bands at 2227 cm<sup>-1</sup> for **5** and at 2239 cm<sup>-1</sup> for **6**. The replacement of Cl ligand with Br have been led to no shift in the vibration of the isocyanide group, as complex **7** has  $\nu(\text{C}\equiv\text{N})$  at 2227 cm<sup>-1</sup> and the iodide ligand changes these vibrations slightly. The according to IR spectroscopy data, the value of  $\nu(\text{C}\equiv\text{N})$  in **4–9** is greater than  $\nu(\text{C}\equiv\text{N})$  in free cyclohexyl isocyanide with 2128 cm<sup>-1</sup> [9], that indicates a significant increase in the electrophilicity of the isocyanide carbon atom, and thus, it suggests the coordination to a metal [10-12].

The <sup>1</sup>H NMR spectra of **4–9** display the characteristic signal of the CH protons from the cyclohexyl rings at *ca.* 4 ppm, while in the <sup>13</sup>C NMR spectrum, the corresponding CH carbon signal emerges at  $\delta_{\text{C}}$  *ca.* 55 ppm (see section S7). The introduction of phosphine ligand in **4–6** proceeds to exhibition of two multiplets at 7.40–7.80 ppm corresponding for phosphine's phenyl protons. As expected, the coordination of isocyanide to platinum shifts the <sup>13</sup>C{<sup>1</sup>H} NMR signal of the terminal carbon atom to downfield, so in particular,  $\delta_{\text{CN}}$  for complexes is 112.1 ppm for **7** [2], 106.60 ppm – **8**, 117.2 ppm – **9**, whereas the  $\delta_{\text{C}}$  in CNCy is 154 ppm [9]. Herein, these  $\delta_{\text{CN}}$  have a typical structure composing of three lines with equal intensity resulting of the <sup>14</sup>N–C coupling ( $J_{\text{C,N}} = 25$  Hz) [5, 13, 14]. Remarkably, this signal shifts in downfield after exchange of one isocyanide ligand with phosphine ( $\delta_{\text{CN}}$  128.65 ppm – **4**, 129.2 – **5**, 134.1 – **6**). The <sup>31</sup>P{<sup>1</sup>H} NMR spectra of complexes **4–6** display only single signal at  $\delta_{\text{P}}$  8.38 (**4**), 8.79 (**5**) and 7.59 ppm (**6**) with the three various doublets of spin–spin coupling P with Pt, N and C atoms ( $J_{\text{P,Pt}}$  *ca.* ~3200–3400 Hz,  $J_{\text{P,C}}$  ~63–65 Hz,  $J_{\text{P,N}}$  ~11 Hz), which suggest that these complexes exist in only one form in solution [5, 7, 15-17]. Besides, these strong influence of spin–spin coupling with N and P atoms was also observed in the <sup>195</sup>Pt NMR spectra. In particular, the <sup>195</sup>Pt NMR

spectrum of complex **7** was shown a signal at  $-4107$  ppm, which has a splitting characteristic for isocyanide complexes on  $^{14}\text{N}$  atom ( $J_{\text{Pt,N}} = \sim 100$  Hz). In contrast, complexes **4–6** have signals as a doublet of triplets  $\delta_{\text{Pt}}$  4118 (**4**), 4394 (**5**) and 4985 (**6**) ppm in the  $^{195}\text{Pt}$  NMR spectra. The influence of the P atom is stronger N atom, since the  $J_{\text{Pt,N}}$  coupling exhibits ca. 105 Hz in comparison with an averaged  $J_{\text{Pt,P}}$  coupling at  $\sim 3300$  Hz [7, 15]. In addition, the  $^{195}\text{Pt}$  signals in **8** and **9** were found that the replacing bromine with iodine shifts  $\delta_{\text{Pt}}$  signals to the upfield at ca.  $\sim 860$  ppm.

The *cis* geometric configuration of **5** and **6** were deduced by the fact that its  $^{31}\text{P}$  NMR spectra are practically the same from that of **4** ( $\delta_{\text{P}}$  ca. 7–9 ppm,  $J_{\text{P,Pt}}$  ca. 3200–3400 Hz). Phosphorus-platinum one-bond spin–spin coupling constants ( $^1J_{\text{P,Pt}}$ ) are dominated by the Fermi contact interaction of nuclei with *s*-orbital electrons [18, 19] and are used as an estimate of the bond strength (Table S2).

**Table S2.**  $^{31}\text{P}$  and  $^1J_{\text{P,Pt}}$  NMR data for  $[\text{PtX}_2(\text{PPh}_3)_2]$  and *cis*- $[\text{PtX}_2(\text{PPh}_3)(\text{CNCy})]$ .

| $\delta_{\text{P}}, ^1J_{\text{P,Pt}}, \text{Hz}$ | <i>cis/trans</i> - $[\text{PtX}_2(\text{PPh}_3)_2]$          | <i>cis</i> - $[\text{PtX}_2(\text{PPh}_3)(\text{CNCy})]$   |
|---------------------------------------------------|--------------------------------------------------------------|------------------------------------------------------------|
| X = Cl                                            | $\delta_{\text{P}} = 14.9$ ( $^1J_{\text{P,Pt}} = 3672$ Hz)  | $\delta_{\text{P}} = 8.4$ ( $^1J_{\text{P,Pt}} = 3416$ Hz) |
| X = Br [3]                                        | $\delta_{\text{P}} = 14.3$ ( $^1J_{\text{P,Pt}} = 3614$ Hz)  | $\delta_{\text{P}} = 8.5$ ( $^1J_{\text{P,Pt}} = 3358$ Hz) |
| X = I [4]                                         | $\delta_{\text{P}} = 11.89$ ( $^1J_{\text{P,Pt}} = 3455$ Hz) | $\delta_{\text{P}} = 7.6$ ( $^1J_{\text{P,Pt}} = 3216$ Hz) |

## S2. X-ray diffraction studies

**Table S3** Crystal data and structure refinement for **5**, **6**, **8**.

| Identification code                       | <b>4</b>                                          | <b>6</b>                                          | <b>7</b>                                          |
|-------------------------------------------|---------------------------------------------------|---------------------------------------------------|---------------------------------------------------|
| CCDC                                      | 1811734                                           | 1839000                                           | 1839001                                           |
| Temperature/K                             | 248.01(10)                                        | 299.12(10)                                        | 299.12(10)                                        |
| Crystal system                            | monoclinic                                        | monoclinic                                        | triclinic                                         |
| Space group                               | P2 <sub>1</sub> /c                                | P2 <sub>1</sub> /c                                | P-1                                               |
| a/Å                                       | 12.4465(5)                                        | 13.3297(3)                                        | 14.1865(4)                                        |
| b/Å                                       | 9.5847(3)                                         | 10.8521(2)                                        | 14.3572(5)                                        |
| c/Å                                       | 13.8166(6)                                        | 17.5272(3)                                        | 14.3860(5)                                        |
| $\alpha/^\circ$                           | 90.00                                             | 90.00                                             | 116.720(3)                                        |
| $\beta/^\circ$                            | 96.484(4)                                         | 109.023(2)                                        | 98.499(3)                                         |
| $\gamma/^\circ$                           | 90.00                                             | 90.00                                             | 93.588(3)                                         |
| Volume/Å <sup>3</sup>                     | 1637.72(11)                                       | 2396.94(9)                                        | 2560.73(16)                                       |
| Z                                         | 4                                                 | 4                                                 | 2                                                 |
| $\rho_{\text{calc}}/\text{g}/\text{cm}^3$ | 2.325                                             | 2.013                                             | 2.128                                             |
| $\mu/\text{mm}^{-1}$                      | 13.437                                            | 9.267                                             | 7.965                                             |
| F(000)                                    | 1072.0                                            | 1384.0                                            | 1528.0                                            |
| Radiation                                 | MoK $\alpha$ ( $\lambda$ = 0.71073)               | MoK $\alpha$ ( $\lambda$ = 0.71073)               | MoK $\alpha$ ( $\lambda$ = 0.71073)               |
| Reflections collected                     | 12587                                             | 46753                                             | 19054                                             |
| Independent reflections                   | 3198 [R <sub>int</sub> = 0.0515]                  | 5432 [R <sub>int</sub> = 0.0406]                  | 10049 [R <sub>int</sub> = 0.0213]                 |
| Final R indexes [all data]                | R <sub>1</sub> = 0.0417, wR <sub>2</sub> = 0.0810 | R <sub>1</sub> = 0.0218, wR <sub>2</sub> = 0.0446 | R <sub>1</sub> = 0.0358, wR <sub>2</sub> = 0.0569 |

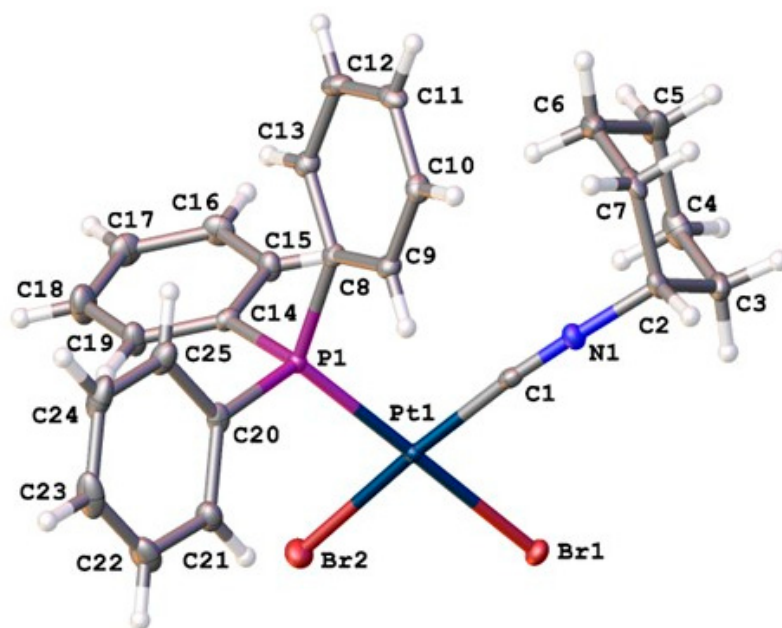

**Figure S1.** The structures of complex 5. The thermal ellipsoids are shown at 50% probability.

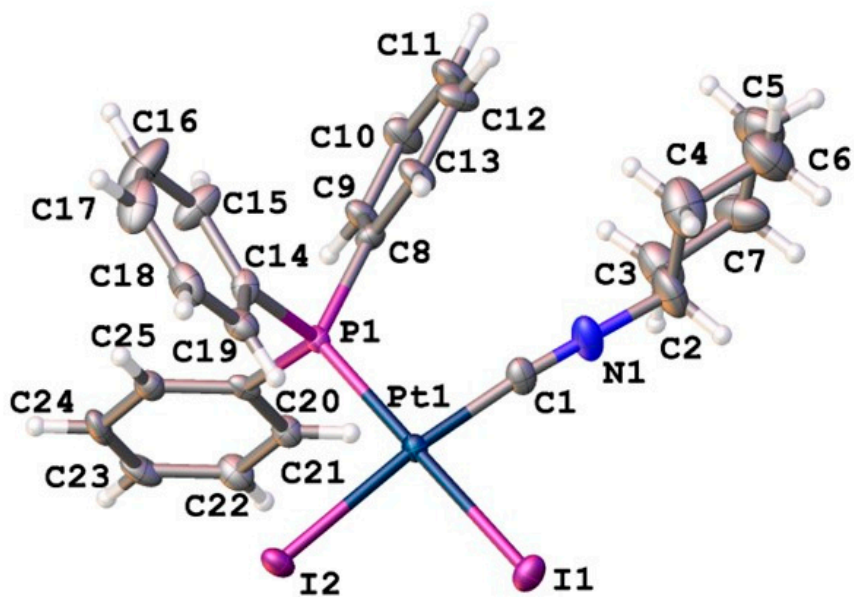

**Figure S2.** The structures of complex 6. The thermal ellipsoids are shown at 50% probability.

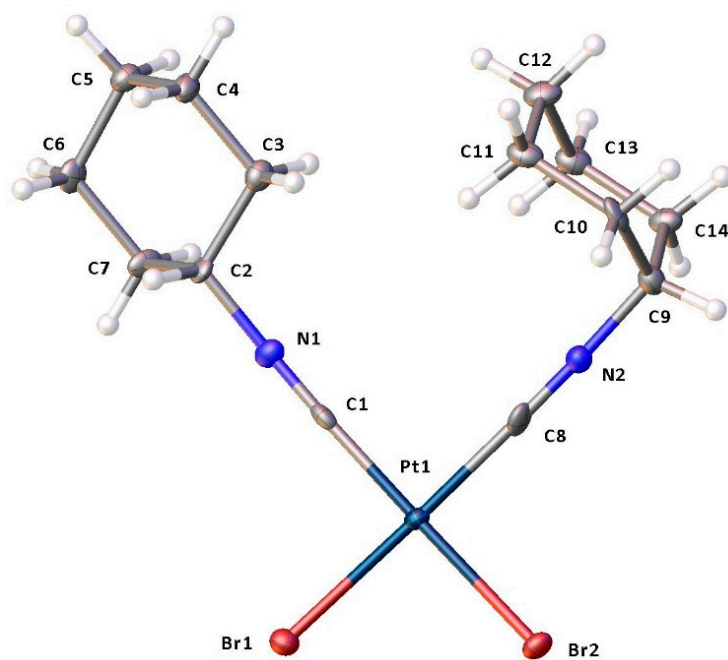

**Figure S3.** The structures of complex 8. The thermal ellipsoids are shown at 50% probability.



**Table S4.** Selected bond lengths (Å) and angles (°) for **5**, **6**, **8**. There are two independent molecules in the unit cell in structure **6**, that are denoted by **A** and **B** letters.

|              | <b>5</b>   | <b>6</b>   |            | <b>8</b>  |
|--------------|------------|------------|------------|-----------|
|              |            | <b>A</b>   | <b>B</b>   |           |
| Pt1–X1       | 2.4251(3)  | 2.6305(4)  | 2.6251(4)  | 2.4478(7) |
| Pt1–X2       | 2.4884(3)  | 2.6611(4)  | 2.6459(4)  | 2.4541(6) |
| Pt1–C1       | 1.918(3)   | 1.906(5)   | 1.930(5)   | 1.916(7)  |
| Pt1–C2       |            |            |            | 1.920(7)  |
| Pt1–P1       | 2.2552(7)  | 2.2634(13) | 2.2592(13) |           |
| N1–C1        | 1.145(4)   | 1.141(6)   | 1.144(6)   | 1.136(8)  |
| N2–C2        |            |            |            | 1.149(8)  |
| N1–C2        | 1.460(4)   | 1.456(6)   | 1.448(7)   | 1.466(9)  |
| N2–C9        |            |            |            | 1.452(8)  |
| ∠(X1–Pt1–X2) | 89.749(11) | 90.526(13) | 92.142(12) | 91.91(2)  |
| ∠(C1–Pt1–X1) | 85.71(9)   | 85.06(15)  | 85.79(14)  | 89.27(17) |
| ∠(C2–Pt1–X2) |            |            |            | 89.08(19) |
| ∠(P1–Pt1–X2) | 88.12(2)   | 89.78(3)   | 87.90(3)   |           |
| ∠(C1–Pt1–C2) |            |            |            | 89.8(3)   |
| ∠(C1–Pt1–P1) | 96.32(9)   | 94.71(16)  | 94.24(14)  |           |
| ∠(Pt1–C1–N1) | 173.9(3)   | 174.5(5)   | 177.4(4)   | 178.0(6)  |
| ∠(Pt1–C2–N2) |            |            |            | 176.5(6)  |
| ∠(C1–N1–C3)  | 173.4(3)   | 176.4(6)   | 172.9(5)   | 174.6(6)  |
| ∠(C2–N2–C9)  |            |            |            | 169.0(6)  |

### S3. CCDC search.

**Table S5. Structures of [PtHal<sub>2</sub>(CNR)(X)] (X = CNR, PR'<sub>3</sub>) observed by CCDC search.**

| Structure                                    | R and/or R'                                                                                                                                                             | Type of isomer | Ref. |
|----------------------------------------------|-------------------------------------------------------------------------------------------------------------------------------------------------------------------------|----------------|------|
| [PtCl <sub>2</sub> (CNR) <sub>2</sub> ]      |                                                                                                                                                                         |                |      |
| CPICPT                                       | CNPh                                                                                                                                                                    | cis            | [20] |
| CPICPT10                                     |                                                                                                                                                                         |                |      |
| CPICPT11                                     |                                                                                                                                                                         |                |      |
| CPICPT12                                     |                                                                                                                                                                         |                |      |
| KIWQAK                                       | ( <i>o</i> -CNC <sub>6</sub> H <sub>4</sub> O) <sub>2</sub> ( <i>o</i> -C(O) <sub>2</sub> C <sub>6</sub> H <sub>4</sub> - <i>o</i> -C(O) <sub>2</sub> )                 | cis            | [16] |
| OZIPIZ                                       | CNC <sub>6</sub> H <sub>4</sub> - <i>p</i> -Br                                                                                                                          | cis            | [21] |
| PIXMUE                                       | CNtBu, CN[Pt(CNtBu) <sub>2</sub> Cl] <sup>+</sup>                                                                                                                       | cis            | [22] |
| QUFVEU                                       | CN-2,6-(2,6-( <i>i</i> -Pr) <sub>2</sub> C <sub>6</sub> H <sub>3</sub> ) <sub>2</sub> -C <sub>6</sub> H <sub>3</sub> )                                                  | trans          | [23] |
| QUFVIY                                       | CN-2,6-(2,6-( <i>i</i> -Pr) <sub>2</sub> C <sub>6</sub> H <sub>3</sub> ) <sub>2</sub> -C <sub>6</sub> H <sub>3</sub> )                                                  | trans          | [23] |
| REJTAD                                       | CNC <sub>6</sub> H <sub>4</sub> - <i>p</i> -F                                                                                                                           | cis            | [24] |
| REJTAD01                                     |                                                                                                                                                                         |                |      |
| REJVIN                                       | CNC <sub>6</sub> H <sub>4</sub> - <i>p</i> -OMe                                                                                                                         | cis            |      |
| REJVUZ                                       |                                                                                                                                                                         |                |      |
| VIDGIA                                       | CNCy                                                                                                                                                                    | cis            | [2]  |
| VIDGOG                                       | CNtBu                                                                                                                                                                   | cis            |      |
| VILYOH                                       | CNXyl                                                                                                                                                                   | cis            | [25] |
| VITZOO                                       |                                                                                                                                                                         |                | [26] |
| VITZOO01                                     |                                                                                                                                                                         |                | [24] |
| VITZOO02                                     |                                                                                                                                                                         |                | [27] |
| [PtI <sub>2</sub> (CNR) <sub>2</sub> ]       |                                                                                                                                                                         |                |      |
| BOKQUN                                       | CN-2,6-( <i>i</i> -Pr) <sub>2</sub> C <sub>6</sub> H <sub>3</sub> - <i>p</i> -Br                                                                                        | trans          | [11] |
| LAWBAM                                       | CNXyl                                                                                                                                                                   | trans          | [28] |
| LAXQOR                                       |                                                                                                                                                                         |                |      |
| MAGCIH                                       | CNC <sub>6</sub> H <sub>2</sub> -2,6-Me <sub>2</sub> -4-CCC <sub>6</sub> H <sub>4</sub> -(4-OCHMe(C <sub>2</sub> H <sub>4</sub> CH <sub>3</sub> ))                      | trans          | [29] |
| MAGCON                                       | CNC <sub>6</sub> H <sub>2</sub> -2,6-Me <sub>2</sub> -4-CCC <sub>6</sub> H <sub>4</sub> -(4-OCHMe(C <sub>4</sub> H <sub>8</sub> CH <sub>3</sub> ))                      | trans          |      |
| MAGCUT                                       | CNC <sub>6</sub> H <sub>2</sub> -2,6-Me <sub>2</sub> -4-CCC <sub>6</sub> H <sub>2</sub> -(3,5-Me <sub>2</sub> -4-OCHMe(C <sub>4</sub> H <sub>8</sub> CH <sub>3</sub> )) | trans          |      |
| PUBJUR                                       | CNC <sub>6</sub> H <sub>2</sub> -2,6- <i>i</i> Pr <sub>2</sub> -4-CNC <sub>6</sub> H <sub>4</sub> -(4-O(CH <sub>2</sub> ) <sub>3</sub> )                                | trans          | [30] |
| PUBKAY                                       | CNC <sub>6</sub> H <sub>2</sub> -2,6- <i>i</i> Pr <sub>2</sub> -4-CNC <sub>6</sub> H <sub>4</sub> -(4-O(CH <sub>2</sub> ) <sub>7</sub> )                                | trans          |      |
| TOWXIP                                       | CNC <sub>6</sub> H <sub>4</sub> - <i>p</i> -F                                                                                                                           | trans          | [31] |
| TOWXOV                                       | CNC <sub>6</sub> H <sub>4</sub> - <i>p</i> -Br                                                                                                                          | trans          |      |
| TOWXUB                                       | CNC <sub>6</sub> H <sub>4</sub> - <i>p</i> -I                                                                                                                           | trans          |      |
| TOWZIR                                       | CNC <sub>6</sub> H <sub>4</sub> - <i>p</i> -F                                                                                                                           | trans          |      |
| TOWZUD                                       | CNC <sub>6</sub> H <sub>4</sub> - <i>p</i> -Br                                                                                                                          | trans          |      |
| TOXMAX                                       | CNC <sub>6</sub> H <sub>4</sub> - <i>p</i> -Cl                                                                                                                          | trans          |      |
| YISBEH                                       | CNC <sub>6</sub> H <sub>4</sub> -4-C <sub>6</sub> H <sub>4</sub> -(4-O(CH <sub>2</sub> ) <sub>5</sub> Et)                                                               | trans          | [32] |
| [PtCl <sub>2</sub> (CNR)(PR' <sub>3</sub> )] |                                                                                                                                                                         |                |      |
| LUJLUX                                       | [Fe(CO) <sub>4</sub> {μ-dppm}], CNCy                                                                                                                                    | cis            | [15] |
| LUJMAE                                       | [Fe(CO) <sub>4</sub> {μ-dppm}], CNCH <sub>2</sub> - <i>p</i> -Tos                                                                                                       | cis            |      |
| VILMEL                                       | PPh <sub>3</sub> , CNMes                                                                                                                                                | cis            | [25] |
| VILQAL                                       | PPh(2-Br-C <sub>2</sub> H <sub>2</sub> C(Me) <sub>2</sub> - <i>o</i> -C <sub>6</sub> H <sub>4</sub> ), CNMes                                                            | cis            |      |
| [PtI <sub>2</sub> (CNR)(PR' <sub>3</sub> )]  |                                                                                                                                                                         |                |      |
| DUWGUX                                       | PPh <sub>3</sub> , 2,2'-CN-1,1'-C <sub>10</sub> H <sub>6</sub>                                                                                                          | trans          | [33] |

## S4. Theoretical studies

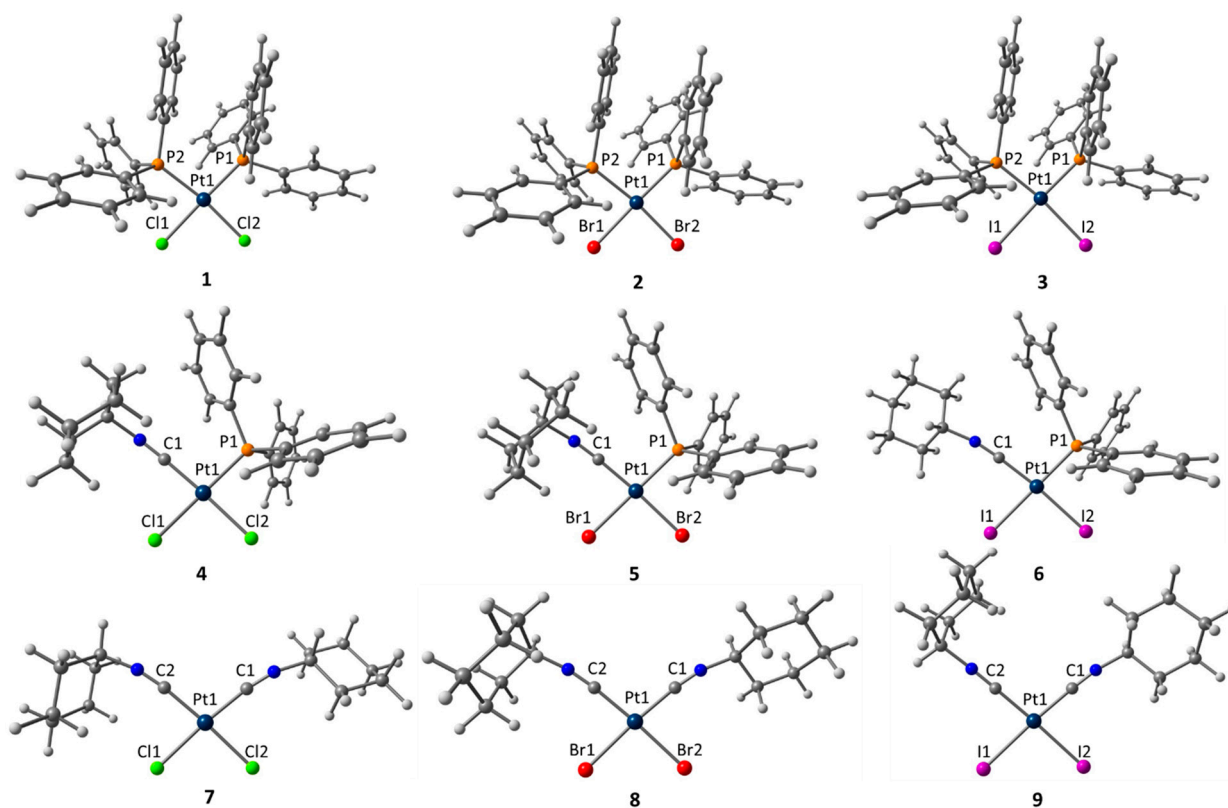

**Figure S4.** View of optimized structures of complexes **1–9**.

**Table S6.** Bond orders and QTAIM of complexes **1–9**, where values of the density of all electrons –  $\rho(\mathbf{r})$ , Laplacian of electron density –  $\nabla^2\rho(\mathbf{r})$ , energy density –  $H_b$ , potential energy density –  $V(\mathbf{r})$ , Lagrangian kinetic energy –  $G(\mathbf{r})$  (a.u.), MBO – Mayer bond order, and WI – Wiberg bond indices.

| Bond     | Optimized<br>bond<br>lengths, Å | Experimental<br>bond<br>lengths, Å | MBO    | WI    | $\rho$ | $G(\mathbf{r})$ | $V(\mathbf{r})$ | $H(\mathbf{r})$ | $\nabla^2\rho(\mathbf{r})$ | $ V(\mathbf{r}) /G(\mathbf{r})$ |
|----------|---------------------------------|------------------------------------|--------|-------|--------|-----------------|-----------------|-----------------|----------------------------|---------------------------------|
| <b>1</b> |                                 |                                    |        |       |        |                 |                 |                 |                            |                                 |
| Pt1–P1   | 2.30070                         | 2.26051                            | 0.7300 | 1.066 | 0.116  | 0.071           | –0.127          | –0.056          | 0.059                      | 1.79                            |
| Pt1–P2   | 2.32539                         | 2.27121                            | 0.6888 | 1.026 | 0.111  | 0.066           | –0.118          | –0.052          | 0.061                      | 1.79                            |
| Pt1–Cl1  | 2.38676                         | 2.35093                            | 0.6800 | 1.093 | 0.087  | 0.071           | –0.100          | –0.029          | 0.173                      | 1.41                            |
| Pt1–Cl2  | 2.36146                         | 2.34837                            | 0.7279 | 1.185 | 0.092  | 0.075           | –0.106          | –0.032          | 0.176                      | 1.41                            |
| <b>2</b> |                                 |                                    |        |       |        |                 |                 |                 |                            |                                 |
| Pt1–P1   | 2.31860                         | 2.27752                            | 0.7118 | 1.031 | 0.112  | 0.068           | –0.121          | –0.053          | 0.064                      | 1.78                            |
| Pt1–P2   | 2.34296                         | 2.29476                            | 0.6971 | 0.997 | 0.107  | 0.064           | –0.112          | –0.048          | 0.066                      | 1.75                            |
| Pt1–Br1  | 2.51929                         | 2.48488                            | 0.6591 | 1.147 | 0.078  | 0.052           | –0.076          | –0.023          | 0.118                      | 1.46                            |
| Pt1–Br2  | 2.49660                         | 2.47295                            | 0.6610 | 1.227 | 0.082  | 0.055           | –0.080          | –0.026          | 0.118                      | 1.45                            |
| <b>3</b> |                                 |                                    |        |       |        |                 |                 |                 |                            |                                 |
| Pt1–P1   | 2.33910                         | 2.27694                            | 0.6871 | 0.998 | 0.108  | 0.065           | –0.114          | –0.048          | 0.069                      | 1.75                            |
| Pt1–P2   | 2.36601                         | 2.29202                            | 0.6547 | 0.962 | 0.102  | 0.062           | –0.105          | –0.044          | 0.072                      | 1.69                            |

|          |         |         |        |       |       |       |        |        |       |      |
|----------|---------|---------|--------|-------|-------|-------|--------|--------|-------|------|
| Pt1-I1   | 2.72346 | 2.65575 | 0.6680 | 1.131 | 0.066 | 0.033 | -0.051 | -0.018 | 0.062 | 1.55 |
| Pt1-I2   | 2.69712 | 2.63425 | 0.6603 | 1.211 | 0.070 | 0.035 | -0.055 | -0.020 | 0.061 | 1.57 |
| <b>4</b> |         |         |        |       |       |       |        |        |       |      |
| Pt1-P1   | 2.30691 | -       | 0.8866 | 1.028 | 0.116 | 0.068 | -0.124 | -0.056 | 0.049 | 1.82 |
| Pt1-C1   | 1.90854 | -       | 1.0264 | 1.428 | 0.171 | 0.185 | -0.289 | -0.105 | 0.335 | 1.56 |
| Pt1-Cl1  | 2.37815 | -       | 0.6986 | 1.151 | 0.089 | 0.071 | -0.101 | -0.030 | 0.169 | 1.42 |
| Pt1-Cl2  | 2.36564 | -       | 0.6711 | 1.146 | 0.091 | 0.076 | -0.107 | -0.031 | 0.181 | 1.41 |
| <b>5</b> |         |         |        |       |       |       |        |        |       |      |
| Pt1-P1   | 2.31893 | 2.25513 | 0.8682 | 1.004 | 0.113 | 0.066 | -0.120 | -0.053 | 0.053 | 1.81 |
| Pt1-C1   | 1.91919 | 1.91757 | 0.9955 | 1.394 | 0.168 | 0.179 | -0.279 | -0.100 | 0.327 | 1.56 |
| Pt1-Br1  | 2.51270 | 2.48843 | 0.6763 | 1.187 | 0.080 | 0.052 | -0.077 | -0.024 | 0.114 | 1.48 |
| Pt1-Br2  | 2.49730 | 2.42508 | 0.6832 | 1.202 | 0.081 | 0.056 | -0.082 | -0.026 | 0.121 | 1.46 |
| <b>6</b> |         |         |        |       |       |       |        |        |       |      |
| Pt1-P1   | 2.33083 | 2.25904 | 0.8141 | 0.983 | 0.110 | 0.064 | -0.115 | -0.051 | 0.057 | 1.80 |
| Pt1-C1   | 1.93687 | 1.92887 | 0.9355 | 1.347 | 0.161 | 0.171 | -0.264 | -0.093 | 0.322 | 1.54 |
| Pt1-I1   | 2.70992 | 2.66087 | 0.6811 | 1.192 | 0.069 | 0.035 | -0.056 | -0.020 | 0.061 | 1.60 |
| Pt1-I2   | 2.69764 | 2.63031 | 0.6686 | 1.166 | 0.067 | 0.034 | -0.053 | -0.019 | 0.061 | 1.56 |
| <b>7</b> |         |         |        |       |       |       |        |        |       |      |
| Pt1-C1   | 1.93062 | 1.91062 | 0.9703 | 1.343 | 0.164 | 0.172 | -0.269 | -0.097 | 0.314 | 1.56 |
| Pt1-C2   | 1.93497 | 1.90393 | 0.9572 | 1.335 | 0.162 | 0.171 | -0.266 | -0.095 | 0.318 | 1.56 |
| Pt1-Cl1  | 2.36609 | 2.32071 | 0.6820 | 1.163 | 0.091 | 0.074 | -0.106 | -0.032 | 0.171 | 1.43 |
| Pt1-Cl2  | 2.35909 | 2.31196 | 0.7101 | 1.180 | 0.093 | 0.075 | -0.108 | -0.033 | 0.171 | 1.44 |
| <b>8</b> |         |         |        |       |       |       |        |        |       |      |
| Pt1-C1   | 1.94243 | 1.91544 | 0.9411 | 1.310 | 0.160 | 0.167 | -0.259 | -0.092 | 0.314 | 1.55 |
| Pt1-C2   | 1.94332 | 1.92021 | 0.9369 | 1.310 | 0.159 | 0.167 | -0.259 | -0.091 | 0.316 | 1.55 |
| Pt1-Br1  | 2.49404 | 2.44784 | 0.6984 | 1.220 | 0.083 | 0.055 | -0.082 | -0.027 | 0.113 | 1.49 |
| Pt1-Br2  | 2.49453 | 2.45411 | 0.7097 | 1.220 | 0.083 | 0.055 | -0.081 | -0.027 | 0.113 | 1.47 |
| <b>9</b> |         |         |        |       |       |       |        |        |       |      |
| Pt1-C1   | 1.95466 | -       | 0.9001 | 1.282 | 0.155 | 0.163 | -0.250 | -0.087 | 0.315 | 1.53 |
| Pt1-C2   | 1.95362 | -       | 0.9063 | 1.285 | 0.156 | 0.164 | -0.251 | -0.087 | 0.316 | 1.53 |
| Pt1-I1   | 2.68852 | -       | 0.7198 | 1.215 | 0.071 | 0.035 | -0.056 | -0.021 | 0.054 | 1.60 |
| Pt1-I2   | 2.69294 | -       | 0.7150 | 1.202 | 0.070 | 0.035 | -0.056 | -0.021 | 0.055 | 1.60 |

**Table S7.** Cartesian atomic coordinates for optimized structures.

### Complex 1

| Atom | X            | Y           | Z            |
|------|--------------|-------------|--------------|
| Pt   | 2.797819000  | 5.038449000 | 8.609659000  |
| Cl   | 3.099470000  | 7.405999000 | 8.591203000  |
| Cl   | 1.249910000  | 5.297056000 | 10.374199000 |
| P    | 4.429744000  | 5.077850000 | 6.953548000  |
| P    | 2.422335000  | 2.768883000 | 8.645969000  |
| C    | 1.199252000  | 2.086981000 | 9.830449000  |
| C    | 1.547956000  | 1.203409000 | 10.853592000 |
| H    | 2.590082000  | 0.903016000 | 10.999505000 |
| C    | 0.563159000  | 0.691718000 | 11.699790000 |
| H    | 0.844619000  | 0.000222000 | 12.499131000 |
| C    | -0.766994000 | 1.057886000 | 11.527124000 |
| H    | -1.536773000 | 0.656547000 | 12.192606000 |
| C    | -1.118321000 | 1.940926000 | 10.505175000 |

|   |              |              |              |
|---|--------------|--------------|--------------|
| H | -2.161879000 | 2.238238000  | 10.370066000 |
| C | -0.141862000 | 2.456623000  | 9.663691000  |
| H | -0.419452000 | 3.162516000  | 8.873992000  |
| C | 3.961893000  | 1.874417000  | 9.079129000  |
| C | 4.428680000  | 0.708196000  | 8.470314000  |
| H | 3.908381000  | 0.284694000  | 7.606819000  |
| C | 5.587009000  | 0.090093000  | 8.939532000  |
| H | 5.950380000  | -0.816683000 | 8.446491000  |
| C | 6.281687000  | 0.624458000  | 10.020998000 |
| H | 7.187202000  | 0.133007000  | 10.388559000 |
| C | 5.822650000  | 1.791317000  | 10.631659000 |
| H | 6.363281000  | 2.218364000  | 11.481024000 |
| C | 4.672103000  | 2.416062000  | 10.161197000 |
| H | 4.305445000  | 3.331878000  | 10.643318000 |
| C | 1.741014000  | 2.134806000  | 7.065249000  |
| C | 1.354074000  | 3.052932000  | 6.084504000  |
| H | 1.482737000  | 4.125274000  | 6.271777000  |
| C | 0.814560000  | 2.614015000  | 4.876840000  |
| H | 0.522899000  | 3.345504000  | 4.117193000  |
| C | 0.653239000  | 1.250739000  | 4.643645000  |
| H | 0.238513000  | 0.901719000  | 3.693534000  |
| C | 0.993452000  | 0.329779000  | 5.635406000  |
| H | 0.834686000  | -0.739394000 | 5.467986000  |
| C | 1.516531000  | 0.768724000  | 6.848129000  |
| H | 1.735071000  | 0.042341000  | 7.638275000  |
| C | 3.862835000  | 5.807086000  | 5.362697000  |
| C | 4.568076000  | 5.584477000  | 4.170666000  |
| H | 5.469452000  | 4.962692000  | 4.170111000  |
| C | 4.123105000  | 6.137562000  | 2.973114000  |
| H | 4.683356000  | 5.955962000  | 2.051391000  |
| C | 2.966166000  | 6.914149000  | 2.950015000  |
| H | 2.614062000  | 7.344581000  | 2.007954000  |
| C | 2.261935000  | 7.141528000  | 4.129448000  |
| H | 1.356794000  | 7.755231000  | 4.120167000  |
| C | 2.705742000  | 6.595441000  | 5.332068000  |
| H | 2.165095000  | 6.799749000  | 6.262313000  |
| C | 5.879454000  | 6.059656000  | 7.500810000  |
| C | 6.210599000  | 6.065095000  | 8.860219000  |
| H | 5.549654000  | 5.570520000  | 9.580352000  |
| C | 7.360106000  | 6.714983000  | 9.297930000  |
| H | 7.608417000  | 6.717259000  | 10.362911000 |
| C | 8.179098000  | 7.378329000  | 8.385579000  |
| H | 9.076978000  | 7.898086000  | 8.732188000  |
| C | 7.844236000  | 7.389678000  | 7.034197000  |
| H | 8.475396000  | 7.920539000  | 6.315773000  |
| C | 6.699832000  | 6.729704000  | 6.590533000  |
| H | 6.443522000  | 6.753081000  | 5.526939000  |

|   |             |             |             |
|---|-------------|-------------|-------------|
| C | 5.236323000 | 3.507336000 | 6.407883000 |
| C | 6.468159000 | 3.114609000 | 6.945711000 |
| H | 6.970037000 | 3.742340000 | 7.688835000 |
| C | 7.074298000 | 1.929336000 | 6.534883000 |
| H | 8.037691000 | 1.641010000 | 6.965868000 |
| C | 6.463907000 | 1.121062000 | 5.579584000 |
| H | 6.947535000 | 0.196405000 | 5.250596000 |
| C | 5.235541000 | 1.499949000 | 5.041277000 |
| H | 4.746356000 | 0.876867000 | 4.286250000 |
| C | 4.626183000 | 2.681862000 | 5.452758000 |
| H | 3.671240000 | 2.969214000 | 5.003496000 |

## Complex 2

| Atom | X             | Y            | Z             |
|------|---------------|--------------|---------------|
| Pt   | -12.049976000 | 0.198992000  | -10.753787000 |
| Br   | -11.767895000 | 2.701698000  | -10.692983000 |
| Br   | -13.548097000 | 0.391139000  | -8.765896000  |
| P    | -12.433881000 | -2.087234000 | -10.794883000 |
| P    | -10.470734000 | 0.278969000  | -12.482681000 |
| C    | -9.014885000  | 1.270192000  | -11.967591000 |
| C    | -8.321918000  | 2.098824000  | -12.851738000 |
| C    | -7.191898000  | 2.791730000  | -12.419739000 |
| C    | -6.745404000  | 2.657569000  | -11.108468000 |
| C    | -7.438613000  | 1.836071000  | -10.220384000 |
| C    | -8.573021000  | 1.152950000  | -10.644399000 |
| C    | -11.089653000 | 1.012239000  | -14.049681000 |
| C    | -10.372774000 | 0.868282000  | -15.246575000 |
| C    | -10.862501000 | 1.410248000  | -16.431458000 |
| C    | -12.076175000 | 2.096047000  | -16.436443000 |
| C    | -12.792897000 | 2.244935000  | -15.252039000 |
| C    | -12.302886000 | 1.709942000  | -14.062299000 |
| C    | -9.666805000  | -1.280383000 | -13.070886000 |
| C    | -8.442629000  | -1.697248000 | -12.533715000 |
| C    | -7.838237000  | -2.872374000 | -12.974333000 |
| C    | -8.443449000  | -3.648684000 | -13.958897000 |
| C    | -9.663858000  | -3.245971000 | -14.497622000 |
| C    | -10.270872000 | -2.072935000 | -14.057476000 |
| C    | -10.892758000 | -2.988574000 | -10.378853000 |
| C    | -10.190598000 | -2.475726000 | -9.277067000  |
| C    | -9.034485000  | -3.103621000 | -8.824489000  |
| C    | -8.561363000  | -4.244709000 | -9.471954000  |
| C    | -9.247869000  | -4.750194000 | -10.572248000 |
| C    | -10.410940000 | -4.128630000 | -11.024923000 |
| C    | -13.105277000 | -2.671334000 | -12.399416000 |
| C    | -13.311463000 | -4.030895000 | -12.669735000 |
| C    | -13.836533000 | -4.428600000 | -13.895740000 |

|   |               |              |               |
|---|---------------|--------------|---------------|
| C | -14.196859000 | -3.474371000 | -14.848464000 |
| C | -14.054327000 | -2.119318000 | -14.561828000 |
| C | -13.513852000 | -1.722086000 | -13.340324000 |
| C | -13.666521000 | -2.810535000 | -9.645103000  |
| C | -13.313103000 | -3.632265000 | -8.573751000  |
| C | -14.300733000 | -4.141553000 | -7.730146000  |
| C | -15.638694000 | -3.834633000 | -7.952381000  |
| C | -15.994986000 | -3.014771000 | -9.023729000  |
| C | -15.015261000 | -2.502476000 | -9.863497000  |
| H | -8.670141000  | 2.226636000  | -13.880876000 |
| H | -6.661945000  | 3.447846000  | -13.116137000 |
| H | -5.860338000  | 3.205002000  | -10.771812000 |
| H | -7.104789000  | 1.741218000  | -9.183408000  |
| H | -9.140168000  | 0.537620000  | -9.936336000  |
| H | -9.426530000  | 0.316678000  | -15.258359000 |
| H | -10.293210000 | 1.291713000  | -17.357863000 |
| H | -12.462895000 | 2.517501000  | -17.368921000 |
| H | -13.741957000 | 2.788159000  | -15.247051000 |
| H | -12.857184000 | 1.848859000  | -13.127670000 |
| H | -7.942498000  | -1.095854000 | -11.768619000 |
| H | -6.880332000  | -3.177948000 | -12.543012000 |
| H | -7.961812000  | -4.565788000 | -14.311100000 |
| H | -10.148232000 | -3.842428000 | -15.276797000 |
| H | -11.218506000 | -1.765972000 | -14.508945000 |
| H | -10.566224000 | -1.579400000 | -8.765692000  |
| H | -8.500613000  | -2.698982000 | -7.959997000  |
| H | -7.651468000  | -4.738416000 | -9.118502000  |
| H | -8.873480000  | -5.635834000 | -11.094659000 |
| H | -10.921645000 | -4.527552000 | -11.905623000 |
| H | -13.078533000 | -4.784889000 | -11.910311000 |
| H | -13.981097000 | -5.492525000 | -14.104437000 |
| H | -14.612503000 | -3.791845000 | -15.809171000 |
| H | -14.359614000 | -1.360518000 | -15.288893000 |
| H | -13.401194000 | -0.656254000 | -13.112456000 |
| H | -12.264743000 | -3.882720000 | -8.385807000  |
| H | -14.015445000 | -4.783597000 | -6.891904000  |
| H | -16.410282000 | -4.232740000 | -7.287125000  |
| H | -17.044676000 | -2.763310000 | -9.198597000  |
| H | -15.298062000 | -1.840917000 | -10.689718000 |

### Complex 3

| Atom | X            | Y            | Z           |
|------|--------------|--------------|-------------|
| Pt   | -4.087803000 | -4.412231000 | 4.878162000 |
| I    | -4.576393000 | -6.449103000 | 3.137573000 |
| I    | -3.368192000 | -6.302565000 | 6.662336000 |
| P    | -3.563630000 | -2.731751000 | 6.418491000 |

|   |              |              |              |
|---|--------------|--------------|--------------|
| P | -4.996059000 | -3.000854000 | 3.210508000  |
| C | -2.788467000 | -3.155565000 | 8.028198000  |
| C | -1.442667000 | -3.543780000 | 8.022622000  |
| C | -0.815194000 | -3.915416000 | 9.204700000  |
| C | -1.526227000 | -3.910932000 | 10.404646000 |
| C | -2.862367000 | -3.524607000 | 10.415914000 |
| C | -3.494766000 | -3.145345000 | 9.232346000  |
| C | -5.098147000 | -1.857494000 | 6.918286000  |
| C | -5.236997000 | -0.474781000 | 7.054975000  |
| C | -6.442526000 | 0.068531000  | 7.496139000  |
| C | -7.516704000 | -0.759824000 | 7.808028000  |
| C | -7.388180000 | -2.141417000 | 7.668530000  |
| C | -6.188522000 | -2.687600000 | 7.221946000  |
| C | -2.333260000 | -1.523468000 | 5.790107000  |
| C | -1.665115000 | -1.795663000 | 4.593504000  |
| C | -0.697085000 | -0.919197000 | 4.105647000  |
| C | -0.385919000 | 0.236535000  | 4.816827000  |
| C | -1.014439000 | 0.493055000  | 6.036177000  |
| C | -1.968066000 | -0.390968000 | 6.531051000  |
| C | -3.963804000 | -2.814957000 | 1.702462000  |
| C | -4.304946000 | -1.883005000 | 0.711228000  |
| C | -3.503544000 | -1.729273000 | -0.416199000 |
| C | -2.347116000 | -2.494898000 | -0.560840000 |
| C | -1.998215000 | -3.417377000 | 0.421613000  |
| C | -2.804205000 | -3.580797000 | 1.546811000  |
| C | -6.621650000 | -3.660288000 | 2.672290000  |
| C | -6.979852000 | -3.793715000 | 1.329801000  |
| C | -8.216340000 | -4.338331000 | 0.987687000  |
| C | -9.103356000 | -4.746198000 | 1.979447000  |
| C | -8.749978000 | -4.615650000 | 3.321688000  |
| C | -7.512457000 | -4.084402000 | 3.666653000  |
| C | -5.399497000 | -1.231985000 | 3.583991000  |
| C | -6.690993000 | -0.839330000 | 3.953905000  |
| C | -6.975491000 | 0.498106000  | 4.221884000  |
| C | -5.977773000 | 1.463982000  | 4.124734000  |
| C | -4.687995000 | 1.084292000  | 3.757509000  |
| C | -4.402015000 | -0.250880000 | 3.487591000  |
| H | -0.884498000 | -3.573230000 | 7.080110000  |
| H | 0.233964000  | -4.223151000 | 9.187786000  |
| H | -1.034278000 | -4.211571000 | 11.334127000 |
| H | -3.424634000 | -3.517215000 | 11.353982000 |
| H | -4.546867000 | -2.846652000 | 9.258160000  |
| H | -4.415124000 | 0.196200000  | 6.791381000  |
| H | -6.540954000 | 1.154557000  | 7.587163000  |
| H | -8.459426000 | -0.328957000 | 8.157536000  |
| H | -8.227036000 | -2.800468000 | 7.909995000  |
| H | -6.086164000 | -3.775894000 | 7.115232000  |



|   |               |              |              |
|---|---------------|--------------|--------------|
| H | -1.910860000  | -2.706654000 | 4.036237000  |
| H | -0.189144000  | -1.145779000 | 3.163400000  |
| H | 0.367024000   | 0.931183000  | 4.433359000  |
| H | -0.746255000  | 1.381725000  | 6.614712000  |
| H | -2.416323000  | -0.207777000 | 7.513210000  |
| H | -5.201423000  | -1.263507000 | 0.825289000  |
| H | -3.782116000  | -1.002530000 | -1.184697000 |
| H | -1.715745000  | -2.369999000 | -1.445385000 |
| H | -1.095478000  | -4.024668000 | 0.312201000  |
| H | -2.540922000  | -4.325446000 | 2.306342000  |
| H | -6.281580000  | -3.505838000 | 0.538673000  |
| H | -8.480976000  | -4.454831000 | -0.067106000 |
| H | -10.069542000 | -5.180151000 | 1.706707000  |
| H | -9.434006000  | -4.950722000 | 4.106269000  |
| H | -7.219160000  | -4.026214000 | 4.721848000  |
| H | -7.494663000  | -1.577833000 | 4.024406000  |
| H | -7.992841000  | 0.783476000  | 4.506073000  |
| H | -6.206165000  | 2.514634000  | 4.327269000  |
| H | -3.895661000  | 1.833472000  | 3.666125000  |
| H | -3.389947000  | -0.523052000 | 3.174937000  |

#### Complex 4

| Atom | X            | Y            | Z            |
|------|--------------|--------------|--------------|
| Pt   | 1.066988000  | 5.095735000  | 8.816118000  |
| P    | 0.402992000  | 6.516466000  | 10.508001000 |
| N    | 2.730717000  | 7.161078000  | 7.260125000  |
| C    | 2.139366000  | 6.384196000  | 7.903764000  |
| C    | 3.101998000  | 8.105026000  | 6.251041000  |
| H    | 4.062695000  | 8.555210000  | 6.558955000  |
| C    | 0.962714000  | 8.242876000  | 10.222100000 |
| C    | 1.016095000  | 6.138528000  | 12.190117000 |
| C    | 2.334450000  | 8.522799000  | 10.297798000 |
| H    | 3.040170000  | 7.724274000  | 10.556808000 |
| C    | -1.412098000 | 6.662960000  | 10.631516000 |
| C    | 1.253983000  | 4.808897000  | 12.557699000 |
| H    | 1.077219000  | 4.006172000  | 11.833287000 |
| C    | -2.182182000 | 6.477855000  | 9.477878000  |
| H    | -1.699137000 | 6.160182000  | 8.546854000  |
| C    | 1.913823000  | 10.826295000 | 9.712967000  |
| H    | 2.284026000  | 11.837512000 | 9.520923000  |
| C    | 2.020973000  | 9.185043000  | 6.169334000  |
| H    | 1.909803000  | 9.674052000  | 7.153084000  |
| H    | 2.388431000  | 9.955068000  | 5.465281000  |
| C    | 2.806311000  | 9.806896000  | 10.049911000 |
| H    | 3.877577000  | 10.015768000 | 10.123092000 |
| C    | 0.074622000  | 9.266312000  | 9.879726000  |

|    |              |              |              |
|----|--------------|--------------|--------------|
| H  | -0.999812000 | 9.064818000  | 9.816811000  |
| C  | 3.264759000  | 7.376557000  | 4.915973000  |
| H  | 4.019230000  | 6.579097000  | 5.019076000  |
| H  | 3.669094000  | 8.114155000  | 4.197411000  |
| C  | 1.219021000  | 7.163518000  | 13.125505000 |
| H  | 1.039248000  | 8.208101000  | 12.848721000 |
| C  | -3.558692000 | 6.677161000  | 9.521039000  |
| H  | -4.156279000 | 6.526495000  | 8.617863000  |
| C  | -2.032579000 | 7.031296000  | 11.828670000 |
| H  | -1.440186000 | 7.163282000  | 12.739987000 |
| C  | 1.940762000  | 6.818634000  | 4.412854000  |
| H  | 2.090169000  | 6.355718000  | 3.423603000  |
| H  | 1.611600000  | 5.996044000  | 5.077162000  |
| C  | 0.551995000  | 10.553011000 | 9.624685000  |
| H  | -0.151995000 | 11.347969000 | 9.362533000  |
| C  | 0.873462000  | 7.903720000  | 4.338755000  |
| H  | -0.085493000 | 7.476538000  | 4.001795000  |
| H  | 1.166072000  | 8.649288000  | 3.572098000  |
| C  | 0.699024000  | 8.617184000  | 5.673683000  |
| H  | -0.046066000 | 9.426567000  | 5.593346000  |
| H  | 0.295499000  | 7.909473000  | 6.425338000  |
| C  | 1.653853000  | 6.860158000  | 14.412392000 |
| H  | 1.810150000  | 7.665146000  | 15.136171000 |
| C  | 1.892475000  | 5.535167000  | 14.773507000 |
| H  | 2.238958000  | 5.298192000  | 15.783646000 |
| C  | 1.691439000  | 4.514880000  | 13.847399000 |
| H  | 1.877320000  | 3.474307000  | 14.127300000 |
| C  | -4.174212000 | 7.049597000  | 10.714971000 |
| H  | -5.257530000 | 7.196880000  | 10.748734000 |
| C  | -3.411821000 | 7.222482000  | 11.867991000 |
| H  | -3.893625000 | 7.503817000  | 12.808616000 |
| Cl | 1.647641000  | 3.650989000  | 7.018576000  |
| Cl | -0.335178000 | 3.465802000  | 9.802788000  |

### Complex 5

| Atom | X            | Y           | Z            |
|------|--------------|-------------|--------------|
| Pt   | 1.195282000  | 5.008854000 | 8.896026000  |
| Br   | 1.911633000  | 3.455811000 | 7.055216000  |
| Br   | -0.238221000 | 3.265216000 | 9.964344000  |
| P    | 0.464068000  | 6.474024000 | 10.537984000 |
| N    | 2.773739000  | 7.085717000 | 7.250382000  |
| C    | 2.222980000  | 6.311171000 | 7.931089000  |
| C    | 3.145889000  | 7.977546000 | 6.195918000  |
| H    | 4.177116000  | 8.315165000 | 6.401971000  |
| C    | 1.013014000  | 8.200939000 | 10.224081000 |
| C    | 1.051079000  | 6.177435000 | 12.245505000 |

|   |              |              |              |
|---|--------------|--------------|--------------|
| C | 2.379378000  | 8.491702000  | 10.342752000 |
| H | 3.081242000  | 7.701485000  | 10.635645000 |
| C | -1.356514000 | 6.596639000  | 10.600714000 |
| C | 1.492278000  | 4.908802000  | 12.635604000 |
| H | 1.479283000  | 4.082455000  | 11.917292000 |
| C | -2.060858000 | 6.506539000  | 9.393869000  |
| H | -1.520718000 | 6.294327000  | 8.463354000  |
| C | 1.961998000  | 10.786700000 | 9.723197000  |
| H | 2.331101000  | 11.799047000 | 9.534859000  |
| C | 2.195429000  | 9.176178000  | 6.199563000  |
| H | 2.226134000  | 9.670859000  | 7.185774000  |
| H | 2.587389000  | 9.900385000  | 5.461160000  |
| C | 2.849905000  | 9.776940000  | 10.099354000 |
| H | 3.916464000  | 9.994540000  | 10.206896000 |
| C | 0.129289000  | 9.214508000  | 9.844204000  |
| H | -0.941570000 | 9.005724000  | 9.751796000  |
| C | 3.096499000  | 7.224704000  | 4.864591000  |
| H | 3.745839000  | 6.335004000  | 4.920476000  |
| H | 3.529182000  | 7.897616000  | 4.100537000  |
| C | 1.058473000  | 7.228951000  | 13.174668000 |
| H | 0.727941000  | 8.230287000  | 12.876449000 |
| C | -3.442712000 | 6.662279000  | 9.378605000  |
| H | -3.986648000 | 6.586943000  | 8.433114000  |
| C | -2.050947000 | 6.819247000  | 11.792205000 |
| H | -1.514109000 | 6.867425000  | 12.744698000 |
| C | 1.674405000  | 6.839295000  | 4.483058000  |
| H | 1.678754000  | 6.353450000  | 3.493640000  |
| H | 1.301338000  | 6.070362000  | 5.186913000  |
| C | 0.606019000  | 10.502265000 | 9.591837000  |
| H | -0.094831000 | 11.289778000 | 9.300096000  |
| C | 0.748560000  | 8.048932000  | 4.484900000  |
| H | -0.280729000 | 7.746115000  | 4.230413000  |
| H | 1.067893000  | 8.754365000  | 3.691593000  |
| C | 0.777271000  | 8.771185000  | 5.825543000  |
| H | 0.128530000  | 9.663385000  | 5.809010000  |
| H | 0.362185000  | 8.111382000  | 6.614009000  |
| C | 1.491410000  | 7.008564000  | 14.478136000 |
| H | 1.492554000  | 7.832998000  | 15.196834000 |
| C | 1.928297000  | 5.741188000  | 14.862394000 |
| H | 2.273673000  | 5.569777000  | 15.886068000 |
| C | 1.929179000  | 4.696935000  | 13.942030000 |
| H | 2.274109000  | 3.702661000  | 14.238604000 |
| C | -4.132196000 | 6.892202000  | 10.568619000 |
| H | -5.220195000 | 7.003719000  | 10.557528000 |
| C | -3.437028000 | 6.964949000  | 11.772714000 |
| H | -3.976666000 | 7.130549000  | 12.709405000 |

## Complex 6

| Atom | X            | Y            | Z            |
|------|--------------|--------------|--------------|
| Pt   | -3.027643000 | 9.083505000  | 7.410427000  |
| I    | -4.681897000 | 9.550625000  | 9.489495000  |
| I    | -4.529794000 | 10.607112000 | 5.747353000  |
| P    | -1.739870000 | 7.764918000  | 8.837216000  |
| N    | -1.212982000 | 8.888299000  | 4.899396000  |
| C    | -1.881329000 | 8.913725000  | 5.858455000  |
| C    | -0.178863000 | 7.197270000  | 8.046553000  |
| C    | -1.664732000 | 9.253026000  | 2.555424000  |
| H    | -2.236359000 | 10.157263000 | 2.823334000  |
| H    | -2.384574000 | 8.412254000  | 2.577198000  |
| C    | -0.325717000 | 10.706043000 | 11.280944000 |
| H    | 0.055574000  | 11.721708000 | 11.144664000 |
| C    | 1.079574000  | 7.687672000  | 8.402191000  |
| H    | 1.177898000  | 8.420119000  | 9.209356000  |
| C    | -0.205457000 | 8.123835000  | 0.849492000  |
| H    | -0.882128000 | 7.249560000  | 0.783351000  |
| H    | 0.267690000  | 8.223608000  | -0.141593000 |
| C    | -2.471474000 | 6.175988000  | 9.373775000  |
| C    | -0.953308000 | 8.882024000  | 12.729487000 |
| H    | -1.064421000 | 8.462523000  | 13.733280000 |
| C    | -0.279238000 | 6.249013000  | 7.018589000  |
| H    | -1.263219000 | 5.858923000  | 6.730706000  |
| C    | 0.861149000  | 5.792767000  | 6.368213000  |
| H    | 0.771284000  | 5.043080000  | 5.576186000  |
| C    | 2.116174000  | 6.289388000  | 6.724650000  |
| H    | 3.014098000  | 5.929963000  | 6.213619000  |
| C    | 2.221290000  | 7.237243000  | 7.737717000  |
| H    | 3.201942000  | 7.626507000  | 8.025991000  |
| C    | -0.717582000 | 9.961681000  | 10.174221000 |
| H    | -0.662810000 | 10.402895000 | 9.171695000  |
| C    | -1.337217000 | 8.127535000  | 11.622206000 |
| H    | -1.756103000 | 7.127266000  | 11.766999000 |
| C    | -0.443623000 | 10.166115000 | 12.561321000 |
| H    | -0.148902000 | 10.756860000 | 13.433278000 |
| C    | -1.211522000 | 8.660700000  | 10.337569000 |
| C    | -3.821227000 | 5.892215000  | 9.149871000  |
| H    | -4.464232000 | 6.640988000  | 8.675906000  |
| C    | -1.023694000 | 9.364255000  | 1.181025000  |
| H    | -0.364795000 | 10.254373000 | 1.156381000  |
| H    | -1.800553000 | 9.539301000  | 0.418950000  |
| C    | -4.349042000 | 4.662756000  | 9.542279000  |
| H    | -5.406143000 | 4.448940000  | 9.362779000  |
| C    | -1.653799000 | 5.212545000  | 9.983735000  |
| H    | -0.589227000 | 5.417604000  | 10.145316000 |

|   |              |             |              |
|---|--------------|-------------|--------------|
| C | -3.537158000 | 3.715792000 | 10.159001000 |
| H | -3.955326000 | 2.752997000 | 10.466774000 |
| C | -2.187422000 | 3.991228000 | 10.380297000 |
| H | -1.545024000 | 3.247039000 | 10.859532000 |
| C | -0.600299000 | 8.987926000 | 3.617685000  |
| H | 0.086351000  | 9.858189000 | 3.659419000  |
| C | 0.846358000  | 7.860752000 | 1.918482000  |
| H | 1.577210000  | 8.693235000 | 1.923982000  |
| H | 1.423457000  | 6.949910000 | 1.688282000  |
| C | 0.217766000  | 7.741825000 | 3.298751000  |
| H | -0.461456000 | 6.867416000 | 3.335576000  |
| H | 0.978802000  | 7.586492000 | 4.082558000  |

### Complex 7

| Atom | X            | Y            | Z            |
|------|--------------|--------------|--------------|
| Pt   | 0.308772000  | -1.182697000 | 6.792511000  |
| Cl   | -0.861753000 | -1.868187000 | 8.722607000  |
| Cl   | -1.270842000 | 0.505353000  | 6.288845000  |
| N    | 1.619017000  | -0.065034000 | 4.218661000  |
| N    | 2.138037000  | -3.484154000 | 7.747937000  |
| C    | 1.189306000  | -0.540802000 | 5.193526000  |
| C    | 1.901546000  | 0.684350000  | 3.029676000  |
| H    | 2.853822000  | 0.295936000  | 2.627220000  |
| C    | 2.048933000  | 2.165287000  | 3.384485000  |
| H    | 2.839014000  | 2.287536000  | 4.144414000  |
| H    | 2.406041000  | 2.673454000  | 2.468941000  |
| C    | 0.731180000  | 2.773447000  | 3.842799000  |
| H    | 0.872823000  | 3.847578000  | 4.046983000  |
| H    | 0.415616000  | 2.315649000  | 4.799520000  |
| C    | -0.365488000 | 2.558316000  | 2.807968000  |
| H    | -1.317688000 | 2.977442000  | 3.172684000  |
| H    | -0.112103000 | 3.112312000  | 1.881346000  |
| C    | -0.534468000 | 1.079925000  | 2.483037000  |
| H    | -0.897541000 | 0.553809000  | 3.386338000  |
| H    | -1.306495000 | 0.933466000  | 1.709723000  |
| C    | 0.777245000  | 0.466143000  | 2.015387000  |
| H    | 1.106649000  | 0.942575000  | 1.072851000  |
| H    | 0.670475000  | -0.611635000 | 1.806383000  |
| C    | 1.509557000  | -2.600961000 | 7.315892000  |
| C    | 2.639104000  | -4.584274000 | 8.506225000  |
| H    | 3.743904000  | -4.498421000 | 8.528429000  |
| C    | 2.093689000  | -4.494689000 | 9.930644000  |
| H    | 0.989218000  | -4.471811000 | 9.865735000  |
| H    | 2.393141000  | -3.534104000 | 10.381391000 |
| C    | 2.568148000  | -5.678097000 | 10.759073000 |
| H    | 3.668791000  | -5.626149000 | 10.874707000 |

|   |             |              |              |
|---|-------------|--------------|--------------|
| H | 2.150570000 | -5.610739000 | 11.776864000 |
| C | 2.194433000 | -7.000039000 | 10.103744000 |
| H | 1.091485000 | -7.091219000 | 10.073430000 |
| H | 2.559276000 | -7.848676000 | 10.705800000 |
| C | 2.740720000 | -7.078049000 | 8.684938000  |
| H | 3.848093000 | -7.073608000 | 8.717567000  |
| H | 2.452997000 | -8.026636000 | 8.202660000  |
| C | 2.259137000 | -5.905648000 | 7.843689000  |
| H | 2.669577000 | -5.944310000 | 6.820841000  |
| H | 1.156938000 | -5.932436000 | 7.749561000  |

### Complex 8

| Atom | X            | Y            | Z            |
|------|--------------|--------------|--------------|
| Pt   | 9.737491000  | 5.214666000  | 6.136253000  |
| Br   | 10.810741000 | 2.964593000  | 6.061756000  |
| Br   | 10.419011000 | 5.765879000  | 3.800795000  |
| N    | 8.504985000  | 8.055916000  | 5.910045000  |
| C    | 8.942127000  | 6.985482000  | 6.068121000  |
| C    | 9.262895000  | 4.694225000  | 7.947440000  |
| C    | 8.262108000  | 9.399025000  | 3.924665000  |
| H    | 7.657665000  | 8.600020000  | 3.464438000  |
| H    | 9.315856000  | 9.165191000  | 3.679959000  |
| N    | 9.034691000  | 4.293446000  | 9.019192000  |
| C    | 7.877161000  | 10.773898000 | 3.401401000  |
| H    | 8.006707000  | 10.805236000 | 2.307319000  |
| H    | 6.798970000  | 10.947958000 | 3.587707000  |
| C    | 9.572541000  | 4.483517000  | 11.377556000 |
| H    | 9.122542000  | 5.490555000  | 11.389859000 |
| H    | 9.317398000  | 4.009678000  | 12.343543000 |
| C    | 8.112826000  | 9.345608000  | 5.443852000  |
| H    | 7.045551000  | 9.481233000  | 5.711568000  |
| C    | 11.083959000 | 4.544333000  | 11.214708000 |
| H    | 11.523035000 | 5.135451000  | 12.035464000 |
| H    | 11.332730000 | 5.085267000  | 10.281478000 |
| C    | 8.932473000  | 10.437344000 | 6.125859000  |
| H    | 10.001300000 | 10.240238000 | 5.917777000  |
| H    | 8.802146000  | 10.376858000 | 7.219313000  |
| C    | 8.915813000  | 3.637643000  | 10.286955000 |
| H    | 7.833521000  | 3.545856000  | 10.488920000 |
| C    | 11.061144000 | 2.314539000  | 10.055075000 |
| H    | 11.317440000 | 2.741915000  | 9.066415000  |
| H    | 11.474623000 | 1.292786000  | 10.051096000 |
| C    | 9.547726000  | 2.246763000  | 10.196008000 |
| H    | 9.272708000  | 1.713519000  | 11.125501000 |
| H    | 9.095056000  | 1.691541000  | 9.357377000  |
| C    | 8.687192000  | 11.871400000 | 4.077068000  |

|   |              |              |              |
|---|--------------|--------------|--------------|
| H | 9.755267000  | 11.750004000 | 3.811779000  |
| H | 8.385902000  | 12.863472000 | 3.701812000  |
| C | 11.686072000 | 3.146480000  | 11.166286000 |
| H | 12.779478000 | 3.202603000  | 11.037149000 |
| H | 11.514732000 | 2.646789000  | 12.140910000 |
| C | 8.538544000  | 11.805903000 | 5.590717000  |
| H | 7.485722000  | 12.014993000 | 5.864954000  |
| H | 9.142743000  | 12.586859000 | 6.080907000  |

### Complex 9

| Atom | X            | Y            | Z            |
|------|--------------|--------------|--------------|
| Pt   | 7.656328000  | 4.403620000  | 5.856145000  |
| N    | 8.200198000  | 7.474285000  | 5.997048000  |
| C    | 8.010620000  | 6.322120000  | 5.976676000  |
| C    | 8.484826000  | 3.847180000  | 7.535611000  |
| C    | 8.224497000  | 9.221618000  | 4.327770000  |
| H    | 7.240997000  | 8.876737000  | 3.968064000  |
| H    | 8.982048000  | 8.646801000  | 3.761245000  |
| N    | 8.983201000  | 3.498403000  | 8.532223000  |
| C    | 8.421053000  | 10.714298000 | 4.112227000  |
| H    | 8.324336000  | 10.952206000 | 3.040434000  |
| H    | 7.608375000  | 11.267169000 | 4.623023000  |
| C    | 9.009585000  | 3.750502000  | 10.944641000 |
| H    | 7.912822000  | 3.639151000  | 10.953044000 |
| H    | 9.389113000  | 3.231209000  | 11.843894000 |
| C    | 8.379843000  | 8.874650000  | 5.806609000  |
| H    | 7.577612000  | 9.381848000  | 6.380344000  |
| C    | 9.424969000  | 5.213811000  | 10.979235000 |
| H    | 9.017894000  | 5.696115000  | 11.883171000 |
| H    | 8.969971000  | 5.744500000  | 10.120545000 |
| C    | 9.730695000  | 9.328167000  | 6.351530000  |
| H    | 10.520820000 | 8.761671000  | 5.822431000  |
| H    | 9.810152000  | 9.067127000  | 7.420406000  |
| C    | 9.591830000  | 3.019834000  | 9.734629000  |
| H    | 9.342779000  | 1.945096000  | 9.791835000  |
| C    | 11.515153000 | 4.660023000  | 9.697244000  |
| H    | 11.155676000 | 5.165252000  | 8.779983000  |
| H    | 12.614259000 | 4.743313000  | 9.677379000  |
| C    | 11.108910000 | 3.194413000  | 9.657650000  |
| H    | 11.535585000 | 2.662756000  | 10.528117000 |
| H    | 11.494769000 | 2.689775000  | 8.756734000  |
| C    | 9.765084000  | 11.180883000 | 4.654342000  |
| H    | 10.577275000 | 10.697668000 | 4.077157000  |
| H    | 9.886645000  | 12.266991000 | 4.508160000  |
| C    | 10.939884000 | 5.358562000  | 10.922068000 |
| H    | 11.228239000 | 6.422992000  | 10.932552000 |

|   |              |              |              |
|---|--------------|--------------|--------------|
| H | 11.381038000 | 4.911434000  | 11.834796000 |
| C | 9.916685000  | 10.821029000 | 6.125828000  |
| H | 9.161608000  | 11.374689000 | 6.717795000  |
| H | 10.899607000 | 11.139094000 | 6.510540000  |
| I | 7.105493000  | 1.789438000  | 5.554866000  |
| I | 6.508978000  | 5.071480000  | 3.513182000  |



## S5. Catalytic investigations.

**Table S8.** Photocatalytic activity of complexes observed in this work in the model hydrosilylation reaction.

| 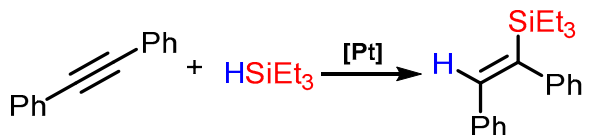 |          |      |            |                            |                             |
|------------------------------------------------------------------------------------|----------|------|------------|----------------------------|-----------------------------|
| Entry                                                                              | Catalyst | mol% | $\tau$ , h | Product yield <sup>b</sup> | TON / TOF                   |
| <b>80 °C</b>                                                                       |          |      |            |                            |                             |
| S1                                                                                 | 1        | 0.5  | 24         | 99 <sup>d</sup>            | 2×10 <sup>2</sup> / 8.3     |
| S2                                                                                 | 2        | 0.5  | 24         | 99 <sup>d</sup>            | 2×10 <sup>2</sup> / 8.3     |
| S3                                                                                 | 3        | 0.5  | 24         | 97 <sup>d</sup>            | 2×10 <sup>2</sup> / 8.3     |
| S4                                                                                 | 4        | 0.5  | 24         | 99 <sup>d</sup>            | 2.0×10 <sup>2</sup> / 8.3   |
| S5                                                                                 | 5        | 0.5  | 24         | 99 <sup>d</sup>            | 2.0×10 <sup>2</sup> / 8.3   |
| S6                                                                                 | 6        | 0.5  | 24         | 84 <sup>d</sup>            | 1.7×10 <sup>2</sup> / 7.1   |
| S7                                                                                 | 7        | 0.5  | 24         | 21 <sup>d</sup>            | 0.4×10 <sup>2</sup> / 1.7   |
| S8                                                                                 | 8        | 0.5  | 24         | 44 <sup>d</sup>            | 0.9×10 <sup>2</sup> / 3.8   |
| S9                                                                                 | 9        | 0.5  | 24         | 13 <sup>d</sup>            | 0.3×10 <sup>2</sup> / 1.3   |
| S10                                                                                | 1        | 0.05 | 24         | 98 <sup>d</sup>            | 2.0×10 <sup>3</sup> / 81.7  |
| S11                                                                                | 2        | 0.05 | 24         | 97 <sup>d</sup>            | 1.9×10 <sup>3</sup> / 80.8  |
| S12                                                                                | 3        | 0.05 | 24         | 97 <sup>d</sup>            | 1.9×10 <sup>3</sup> / 80.8  |
| S13                                                                                | 4        | 0.05 | 24         | 99 <sup>d</sup>            | 2.0×10 <sup>3</sup> / 82.5  |
| S14                                                                                | 5        | 0.05 | 24         | 99 <sup>d</sup>            | 2.0×10 <sup>3</sup> / 82.5  |
| S15                                                                                | 6        | 0.05 | 24         | 99 <sup>d</sup>            | 2.0×10 <sup>3</sup> / 82.5  |
| <b>40 °C</b>                                                                       |          |      |            |                            |                             |
| S16                                                                                | 1        | 0.05 | 6          | 20                         | 4.0×10 <sup>2</sup> / 66.7  |
| S17                                                                                | 2        | 0.05 | 6          | 20                         | 4.0×10 <sup>2</sup> / 66.7  |
| S18                                                                                | 3        | 0.05 | 6          | 5                          | 1.0×10 <sup>2</sup> / 16.7  |
| S19                                                                                | 4        | 0.05 | 6          | 98                         | 2.0×10 <sup>3</sup> / 326.7 |
| S20                                                                                | 5        | 0.05 | 6          | ≤5                         | –                           |
| S21                                                                                | 6        | 0.05 | 6          | ≤5                         | –                           |
| S22                                                                                | 1        | 0.5  | 24         | 52                         | 1.0×10 <sup>2</sup> / 4.3   |
| S23                                                                                | 2        | 0.5  | 24         | 96                         | 1.9×10 <sup>2</sup> / 8.0   |
| S24                                                                                | 4        | 0.5  | 24         | 98                         | 2.0×10 <sup>2</sup> / 8.3   |
| S25                                                                                | 5        | 0.5  | 24         | 98                         | 2.0×10 <sup>2</sup> / 8.3   |
| <b>LED 400 nm</b>                                                                  |          |      |            |                            |                             |
| S26                                                                                | 1        | 0.5  | 12         | 57                         | 1.2×10 <sup>2</sup> / 4.3   |
| S27                                                                                | 2        | 0.5  | 12         | 85                         | 1.7×10 <sup>2</sup> / 14.2  |

|                   |   |      |    |          |                           |
|-------------------|---|------|----|----------|---------------------------|
| S28               | 3 | 0.5  | 12 | 70       | $1.4 \times 10^2 / 11.7$  |
| S29               | 4 | 0.5  | 12 | 30       | $0.6 \times 10^2 / 5.0$   |
| S30               | 5 | 0.5  | 12 | 98       | $2.0 \times 10^2 / 16.3$  |
| S30               | 6 | 0.5  | 12 | 99       | $2.0 \times 10^2 / 16.5$  |
| S31               | 7 | 0.5  | 12 | 33       | $0.7 \times 10^2 / 5.5$   |
| S32               | 8 | 0.5  | 12 | 10       | $0.2 \times 10^2 / 1.7$   |
| S33               | 9 | 0.5  | 12 | $\leq 5$ | –                         |
| S34               | 5 | 0.05 | 24 | 99       | $2.0 \times 10^3 / 82.5$  |
| S35               | 6 | 0.05 | 24 | 99       | $2.0 \times 10^3 / 82.5$  |
| S36               | 5 | 0.05 | 12 | 73       | $1.5 \times 10^3 / 121.7$ |
| S37               | 6 | 0.05 | 12 | 52       | $1.0 \times 10^3 / 86.7$  |
| S38               | 1 | 0.05 | 6  | 38       | $7.6 \times 10^2 / 126.7$ |
| S39               | 2 | 0.05 | 6  | 20       | $4.0 \times 10^2 / 66.7$  |
| S40               | 3 | 0.05 | 6  | 6        | $1.2 \times 10^2 / 20.0$  |
| S41               | 4 | 0.05 | 6  | 15       | $3.0 \times 10^2 / 50.0$  |
| S42               | 5 | 0.05 | 6  | 30       | $6.0 \times 10^2 / 100.0$ |
| S43               | 6 | 0.05 | 6  | 43       | $8.6 \times 10^2 / 143.3$ |
| <b>LED 450 nm</b> |   |      |    |          |                           |
| S44               | 1 | 0.5  | 12 | 83       | $1.7 \times 10^2 / 13.8$  |
| S45               | 2 | 0.5  | 12 | 58       | $1.2 \times 10^2 / 9.7$   |
| S46               | 3 | 0.5  | 12 | 8        | $0.2 \times 10^2 / 1.3$   |
| S47               | 4 | 0.5  | 12 | 11       | $0.2 \times 10^2 / 1.8$   |
| S48               | 5 | 0.5  | 12 | 14       | $0.3 \times 10^2 / 2.3$   |
| S49               | 6 | 0.5  | 12 | 12       | $0.2 \times 10^2 / 2.0$   |
| S50               | 7 | 0.5  | 12 | 22       | $0.4 \times 10^2 / 3.6$   |
| S51               | 8 | 0.5  | 12 | 20       | $0.4 \times 10^2 / 3.3$   |
| S52               | 9 | 0.5  | 12 | $\leq 5$ | –                         |
| S53               | 1 | 0.05 | 12 | 68       | $1.4 \times 10^3 / 133.3$ |
| S54               | 1 | 0.05 | 24 | 99       | $2.0 \times 10^3 / 82.5$  |
| S55               | 2 | 0.05 | 24 | 99       | $2.0 \times 10^3 / 82.5$  |
| S56               | 1 | 0.05 | 6  | 31       | $6.2 \times 10^2 / 103.3$ |
| S57               | 2 | 0.05 | 6  | 23       | $4.6 \times 10^2 / 76.7$  |
| S58               | 3 | 0.05 | 6  | 8        | $1.6 \times 10^2 / 26.7$  |
| S59               | 4 | 0.05 | 6  | 15       | $3.0 \times 10^2 / 50.0$  |
| S60               | 5 | 0.05 | 6  | 8        | $1.6 \times 10^2 / 26.7$  |
| S61               | 6 | 0.05 | 6  | 6        | $1.2 \times 10^2 / 20.0$  |

<sup>a</sup>Reaction conditions: 1,2-diphenylacetylene ( $5.0 \cdot 10^{-4}$  mol), Et<sub>3</sub>SiH ( $7.5 \cdot 10^{-4}$  mol); toluene (0.5 mL). <sup>b</sup>Yield of 1,2-(diphenylvinyl)triethylsilane was determined by <sup>1</sup>H NMR spectroscopy using 1,2-dimethoxyethane as the internal standard; product obtained as a mixture of E/Z isomers; (E 75–85%). <sup>d</sup>E/Z isomers; (Z  $\leq$  5%).

## S6 UV/vis absorption spectra

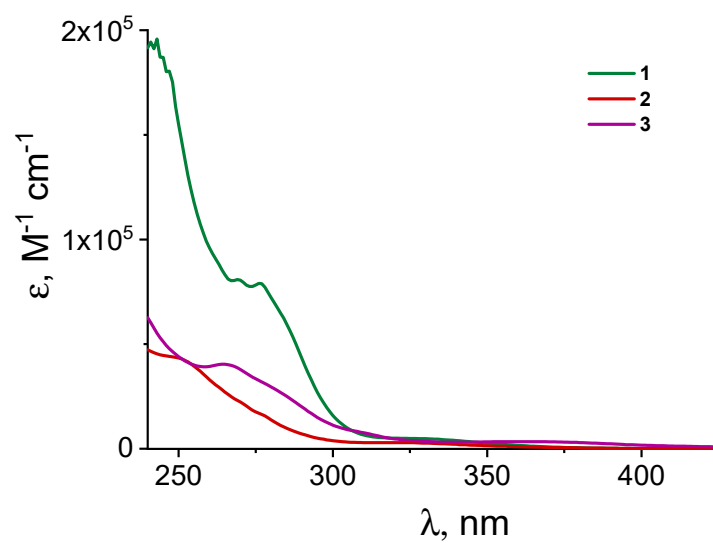

**Figure S5.** UV/vis absorption spectra of complexes **1–3** in  $\text{CH}_2\text{Cl}_2$  at RT ( $2 \times 10^{-5} \text{ M}$ ).

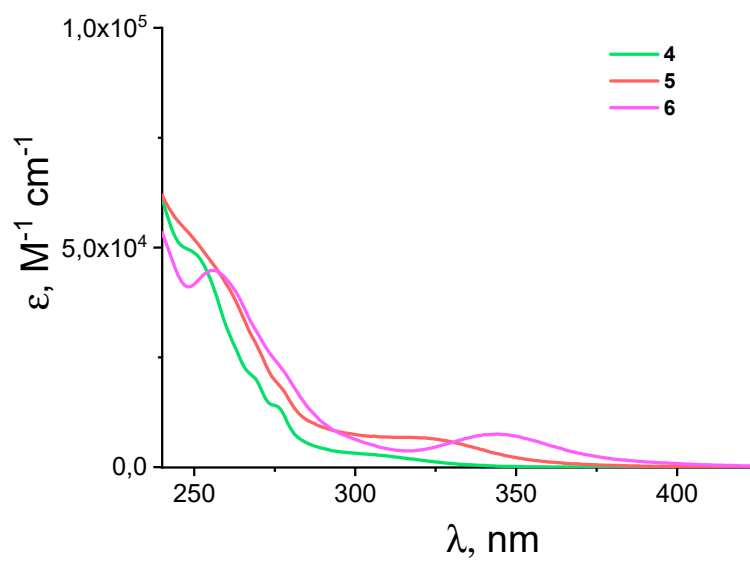

**Figure S6.** UV/vis absorption spectra of complexes **4–6** in  $\text{CH}_2\text{Cl}_2$  at RT ( $2 \times 10^{-5} \text{ M}$ ).

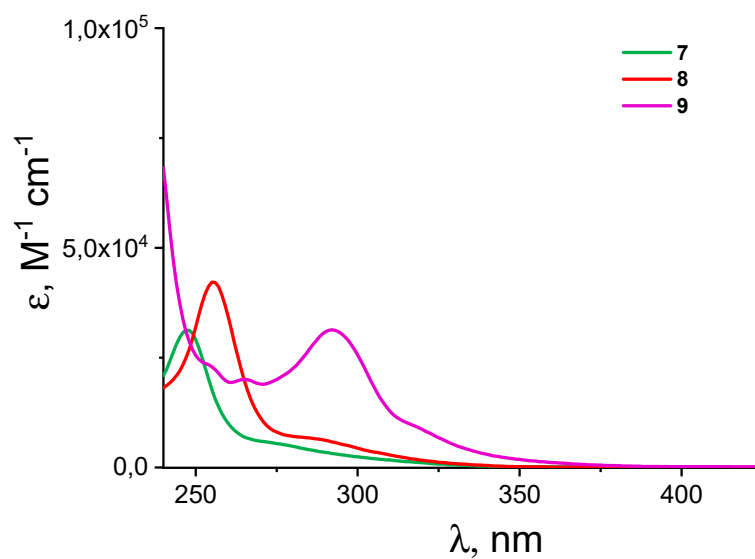

**Figure S7.** UV/vis absorption spectra of complexes **7–9** in CH<sub>2</sub>Cl<sub>2</sub> at RT ( $2 \times 10^{-5}$  M).

**Table S9.** UV-Vis absorption data for **1–9**.

| Complex  | $\lambda_{\text{max}}$ , nm ( $\epsilon \times 10^{-6}$ M <sup>-1</sup> cm <sup>-1</sup> ) |
|----------|--------------------------------------------------------------------------------------------|
| <b>1</b> | 241 (1.94), 269 (0.81), 277 (0.79), 327sh (0.05)                                           |
| <b>2</b> | 250 (0.43), 323 (0.03)                                                                     |
| <b>3</b> | 265 (0.40), 362 (0.03)                                                                     |
| <b>4</b> | 254 (0.23), 265 (0.20), 293 (0.31), 317sh (0.17)                                           |
| <b>5</b> | 247sh (0.55), 321 (0.07)                                                                   |
| <b>6</b> | 256 (0.45), 343 (0.08)                                                                     |
| <b>7</b> | 248 (0.31)                                                                                 |
| <b>8</b> | 250sh (0.49), 269 (0.20), 276 (0.14), 306sh (0.03)                                         |
| <b>9</b> | 255 (0.42), 284 (0.07)                                                                     |

## S7. NMR spectra

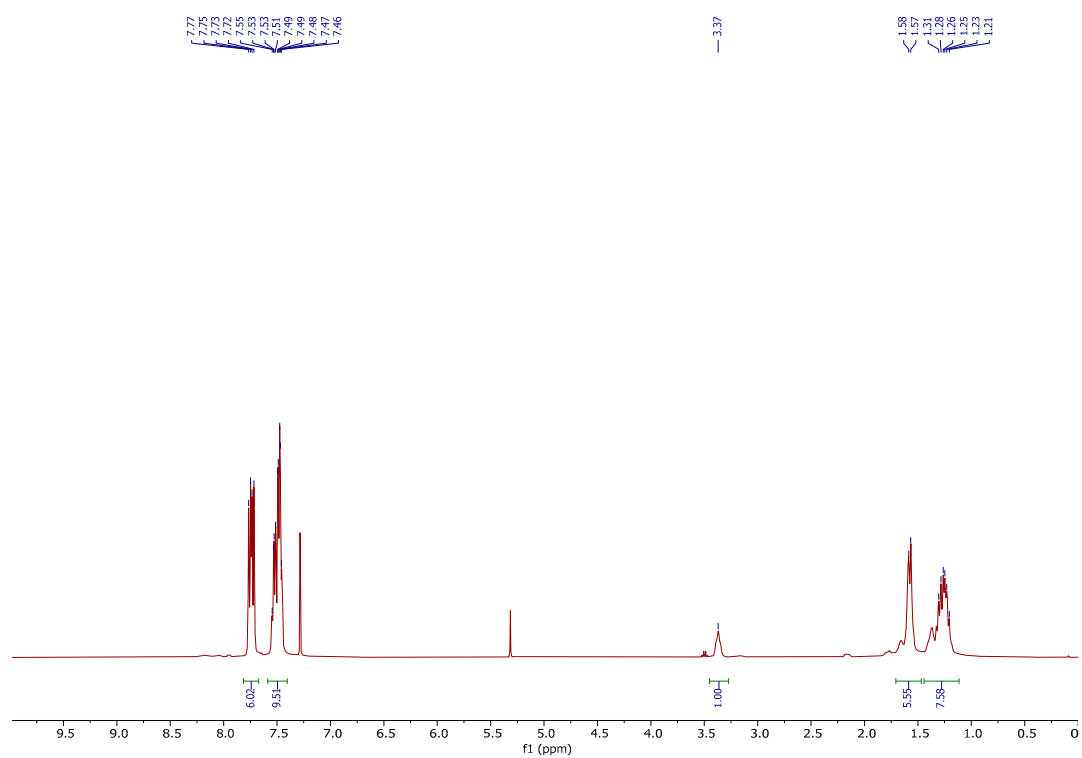

**Figure S8.** The <sup>1</sup>H NMR spectra of [PtCl<sub>2</sub>(CNCy)(PPh<sub>3</sub>)<sub>2</sub>] **4**.

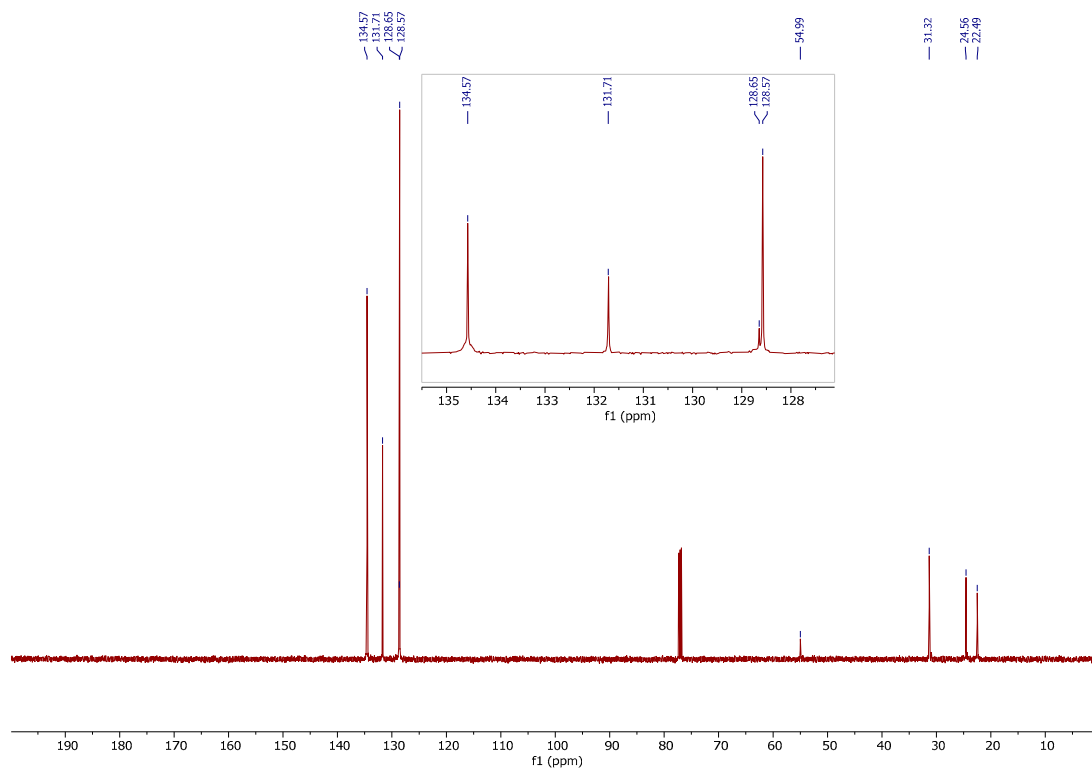

**Figure S9.** The <sup>13</sup>C{<sup>1</sup>H, <sup>31</sup>P} NMR spectra of [PtCl<sub>2</sub>(CNCy)(PPh<sub>3</sub>)<sub>2</sub>] **4**.

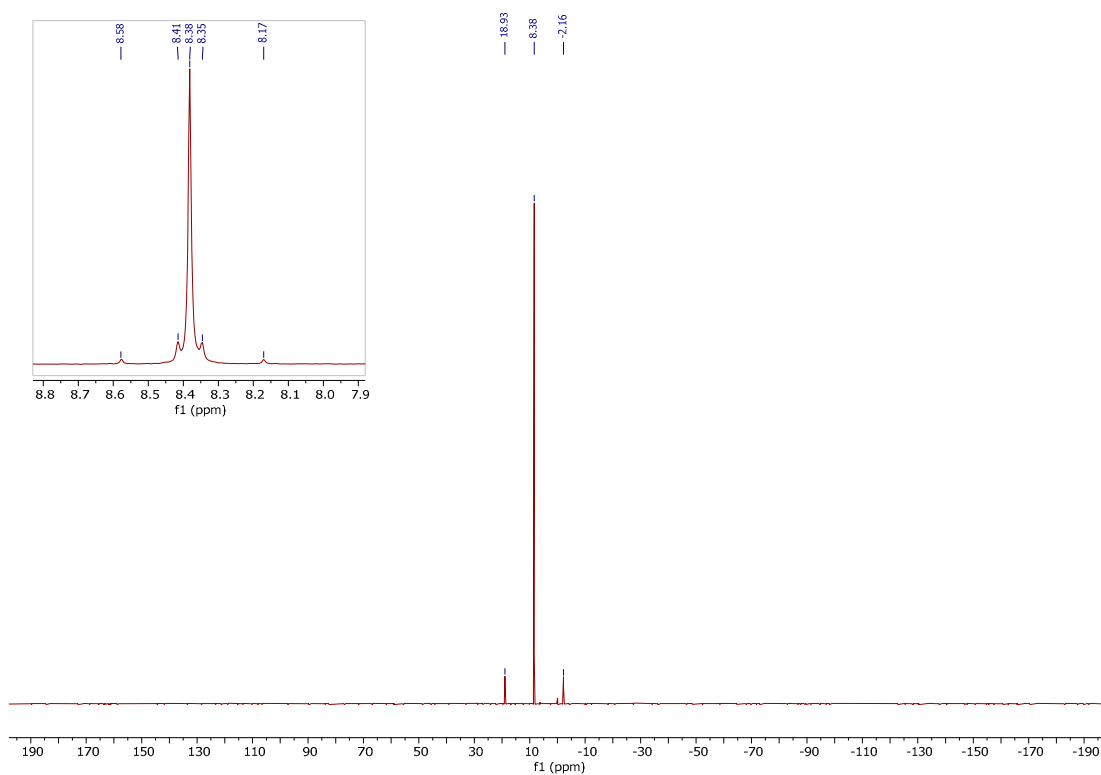

**Figure S10.** The  $^{31}\text{P}\{^1\text{H}\}$  NMR spectra of  $[\text{PtCl}_2(\text{CNCy})(\text{PPh}_3)_2]$  **4**.

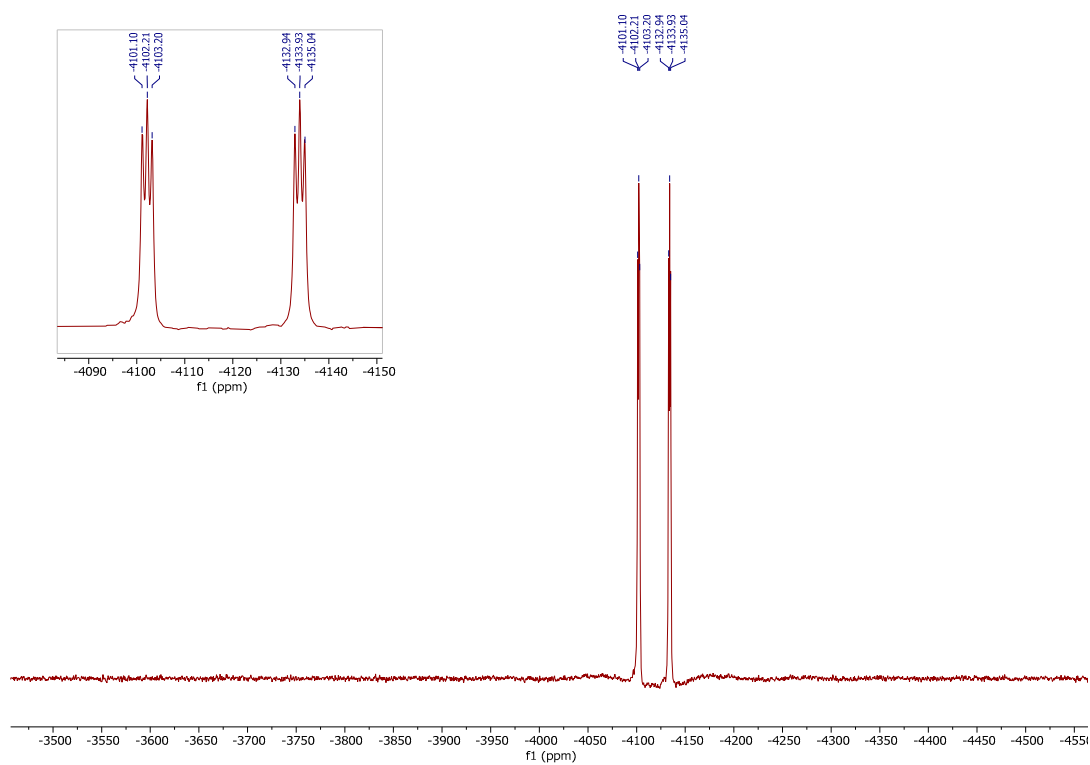

**Figure S11.** The  $^{195}\text{Pt}\{^1\text{H}\}$  NMR spectra of  $[\text{PtCl}_2(\text{CNCy})(\text{PPh}_3)_2]$  **4**.

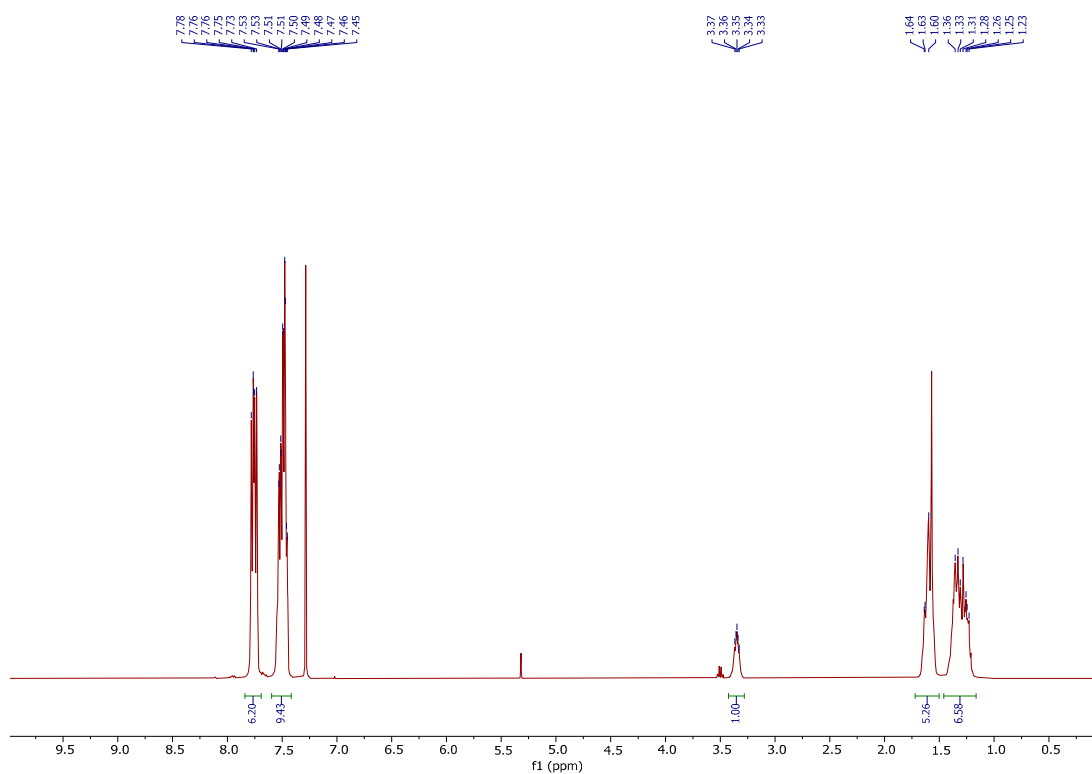

**Figure S12.** The <sup>1</sup>H NMR spectra of [PtBr<sub>2</sub>(CNCy)(PPh<sub>3</sub>)<sub>2</sub>] 5.

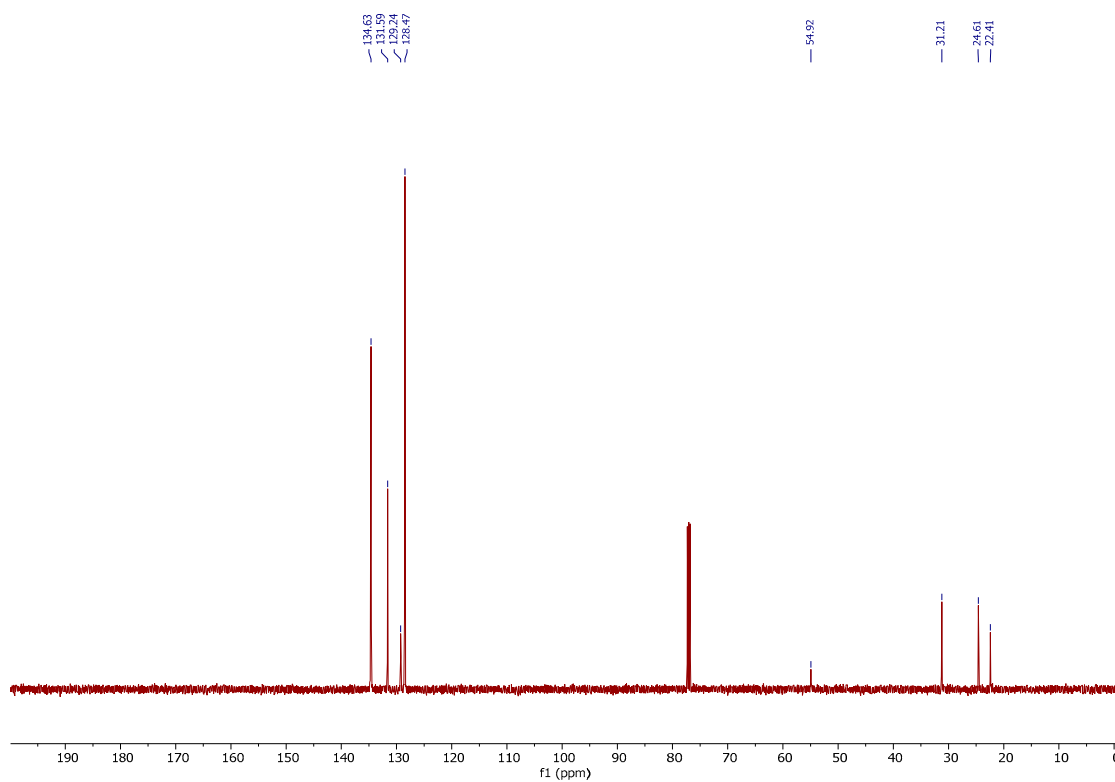

**Figure S13.** The <sup>13</sup>C{<sup>1</sup>H, <sup>31</sup>P} NMR spectra of [PtBr<sub>2</sub>(CNCy)(PPh<sub>3</sub>)<sub>2</sub>] 5.

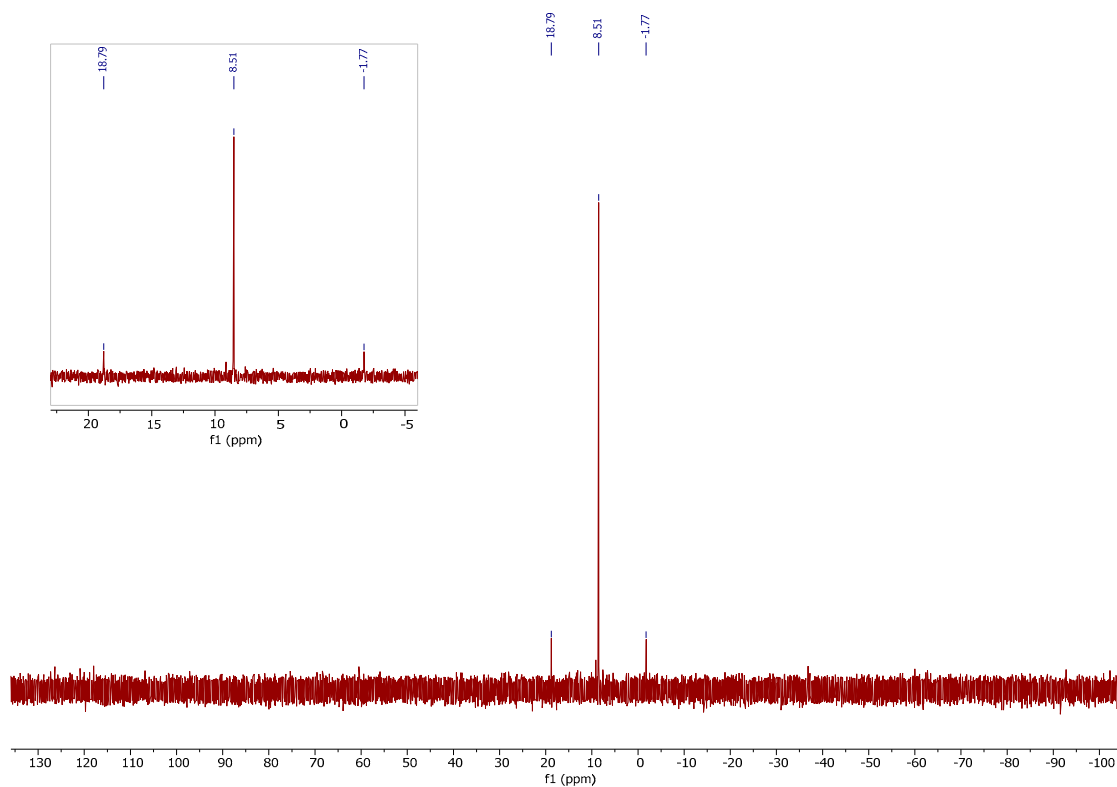

**Figure S14.** The  $^{31}\text{P}\{^1\text{H}\}$  NMR spectra of  $[\text{PtBr}_2(\text{CNCy})(\text{PPh}_3)_2]$  **5**.

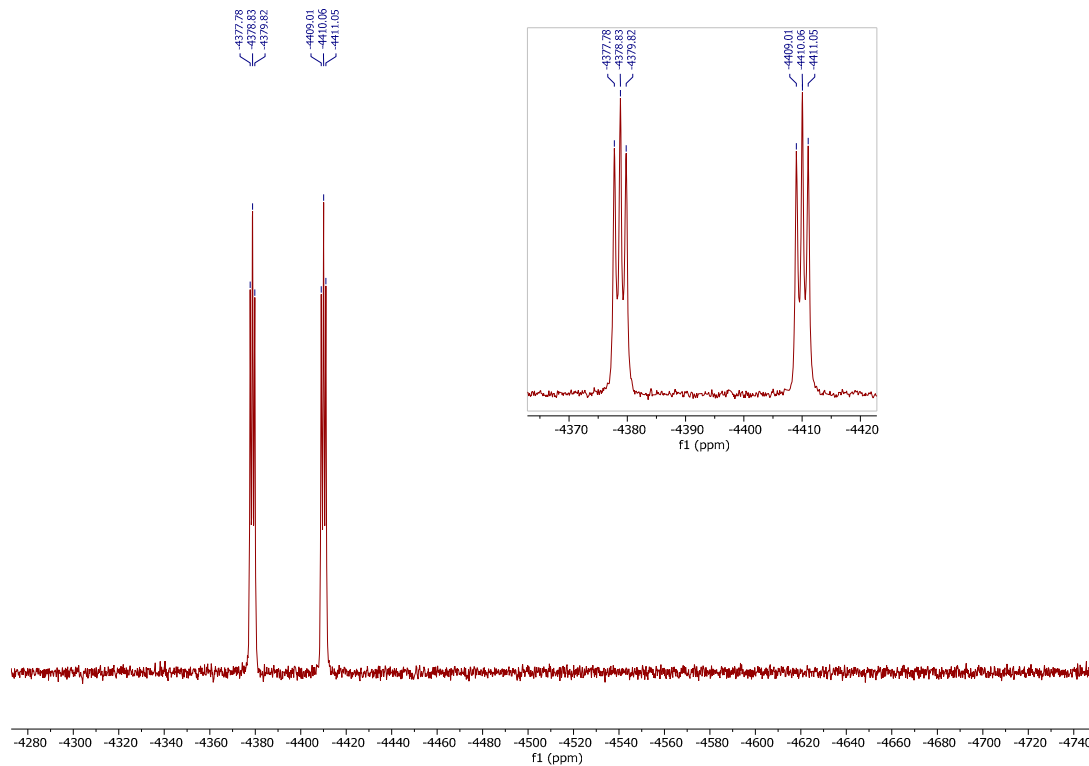

**Figure S15.** The  $^{195}\text{Pt}\{^1\text{H}\}$  NMR spectra of  $[\text{PtBr}_2(\text{CNCy})(\text{PPh}_3)_2]$  **5**.



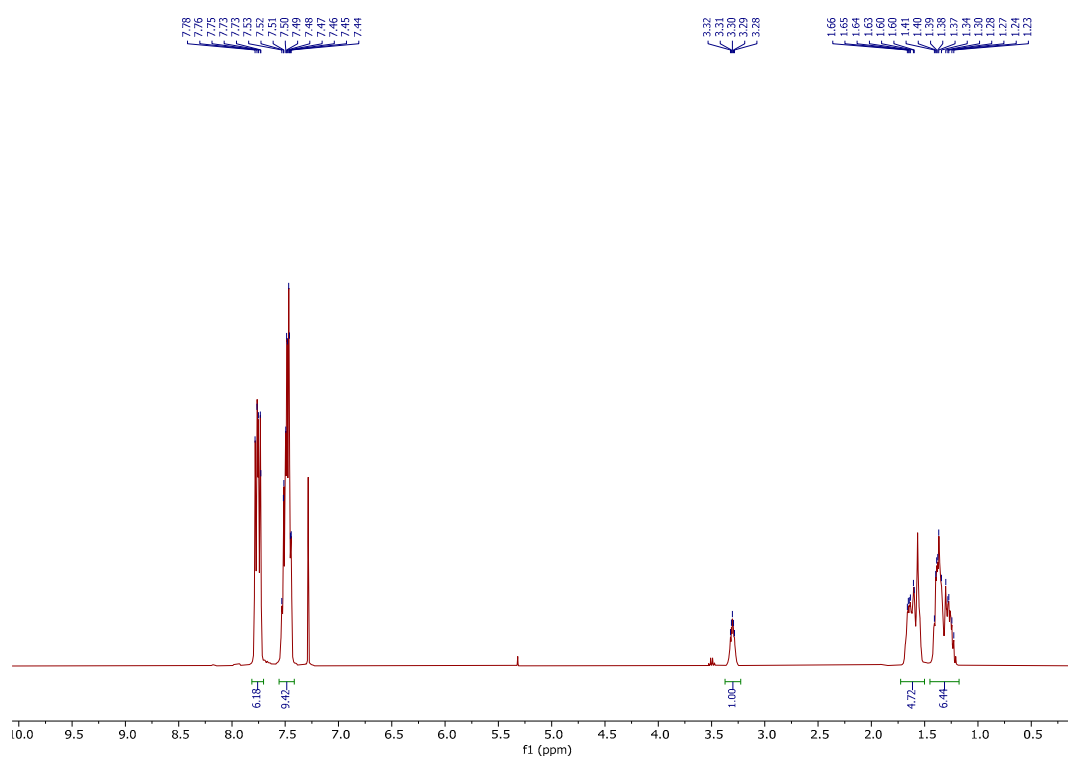

**Figure S16.** The <sup>1</sup>H NMR spectra of [PtI<sub>2</sub>(CNCy)(PPh<sub>3</sub>)<sub>2</sub>] **6**.

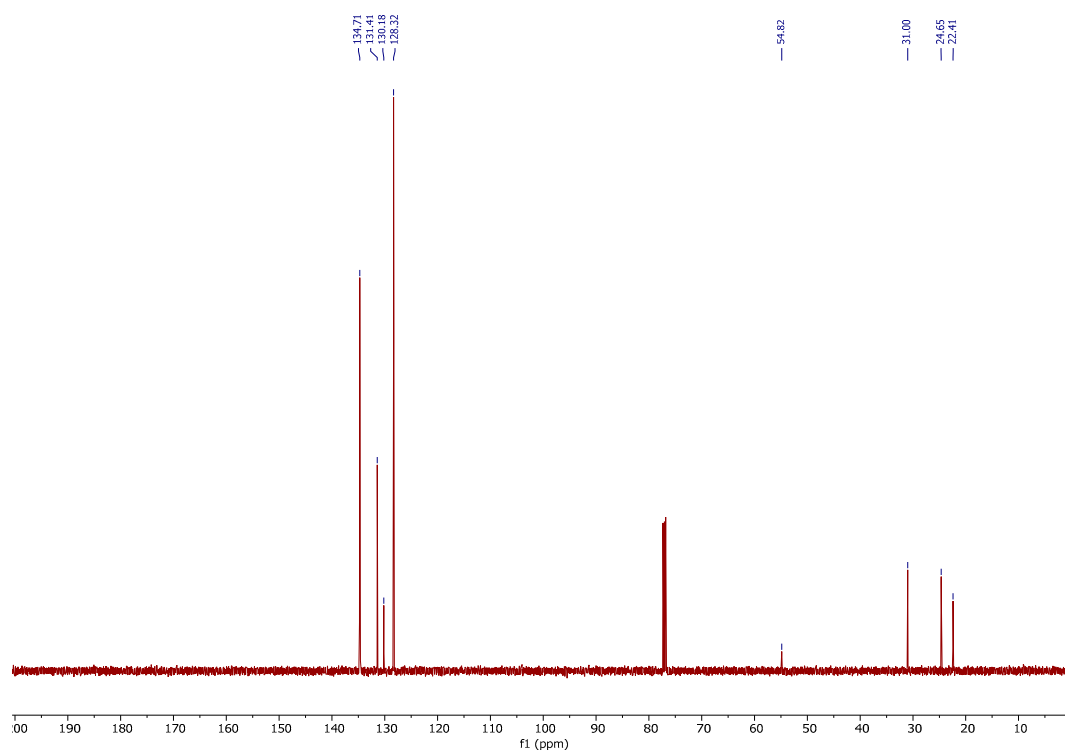

**Figure S17.** The <sup>13</sup>C{<sup>1</sup>H, <sup>31</sup>P} NMR spectra of [PtI<sub>2</sub>(CNCy)(PPh<sub>3</sub>)<sub>2</sub>] **6**.

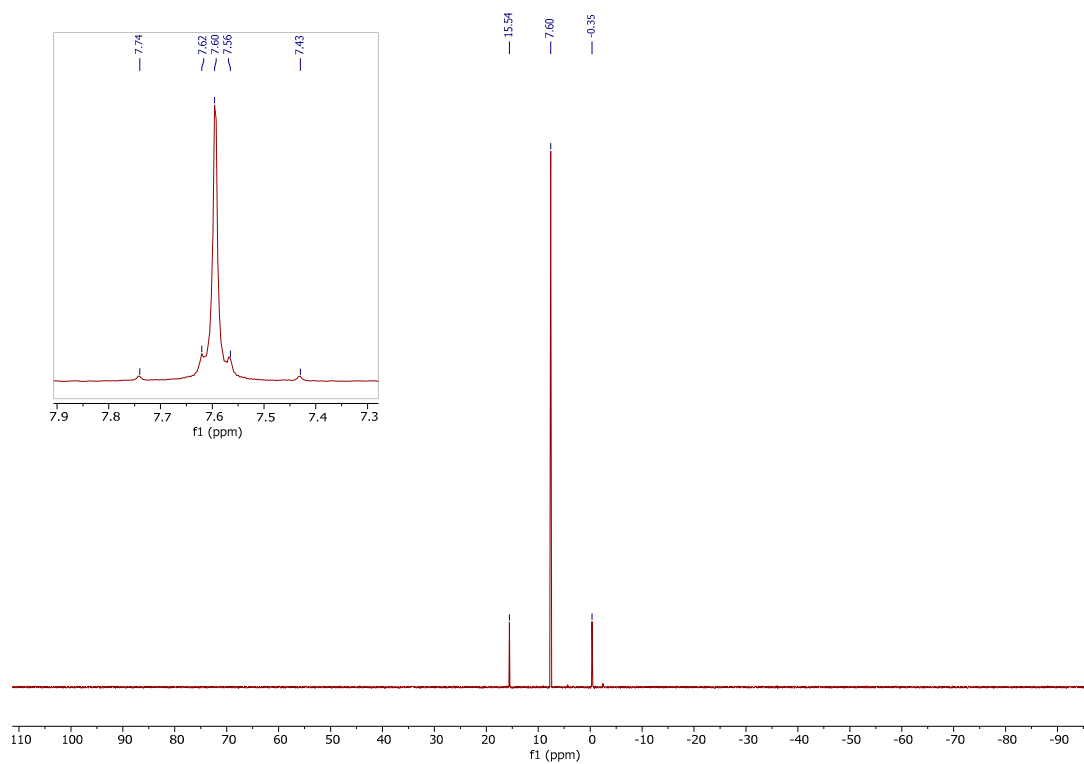

**Figure S18.** The  $^{31}\text{P}\{^1\text{H}\}$  NMR spectra of  $[\text{PtI}_2(\text{CNCy})(\text{PPh}_3)_2]$  **6**.

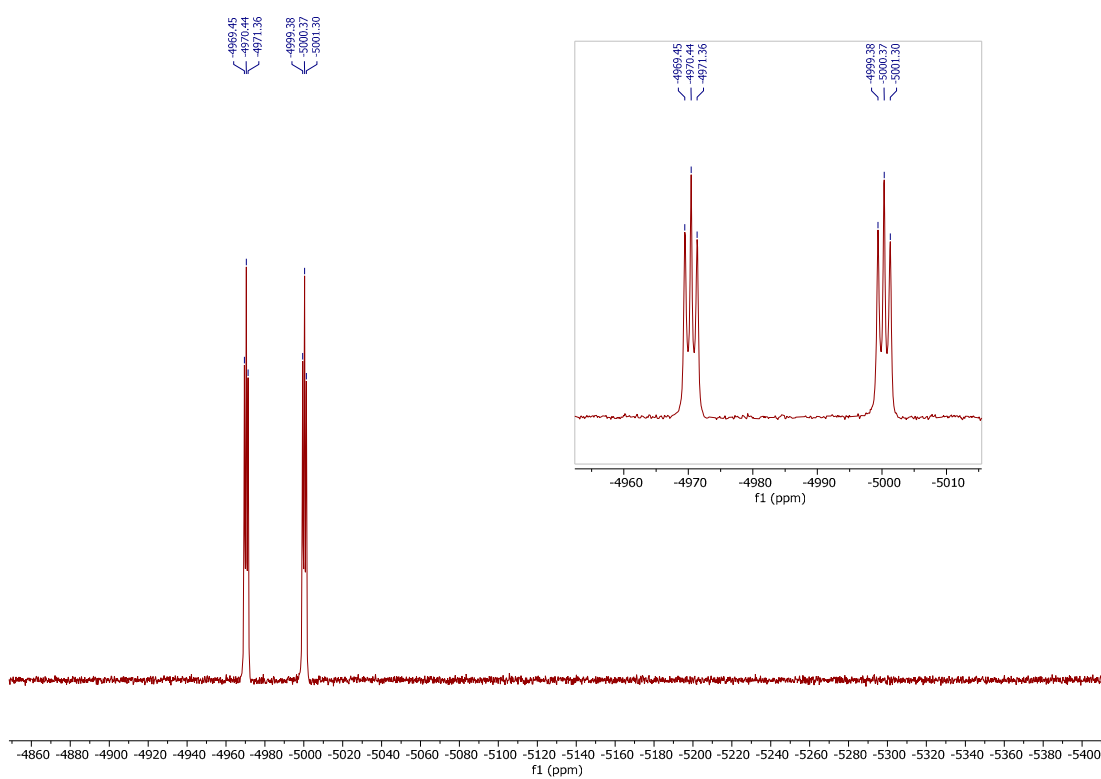

**Figure S19.** The  $^{195}\text{Pt}\{^1\text{H}\}$  NMR spectra of  $[\text{PtI}_2(\text{CNCy})(\text{PPh}_3)_2]$  **6**.

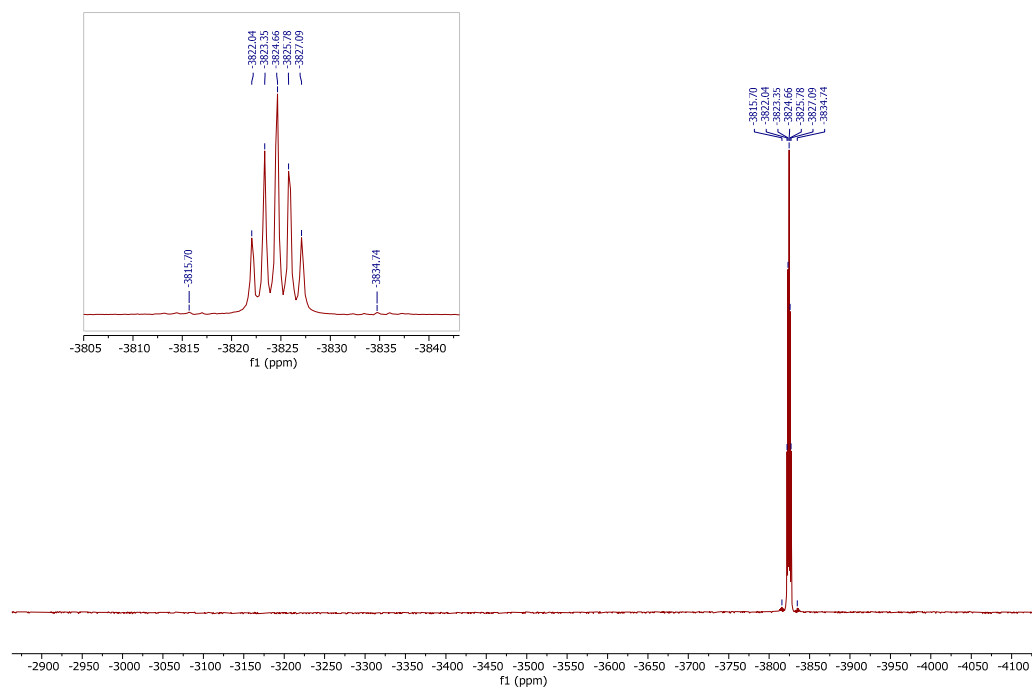

**Figure S20.** The  $^{195}\text{Pt}\{^1\text{H}\}$  NMR spectra of  $[\text{PtCl}_2(\text{CNCy})_2]$  7.

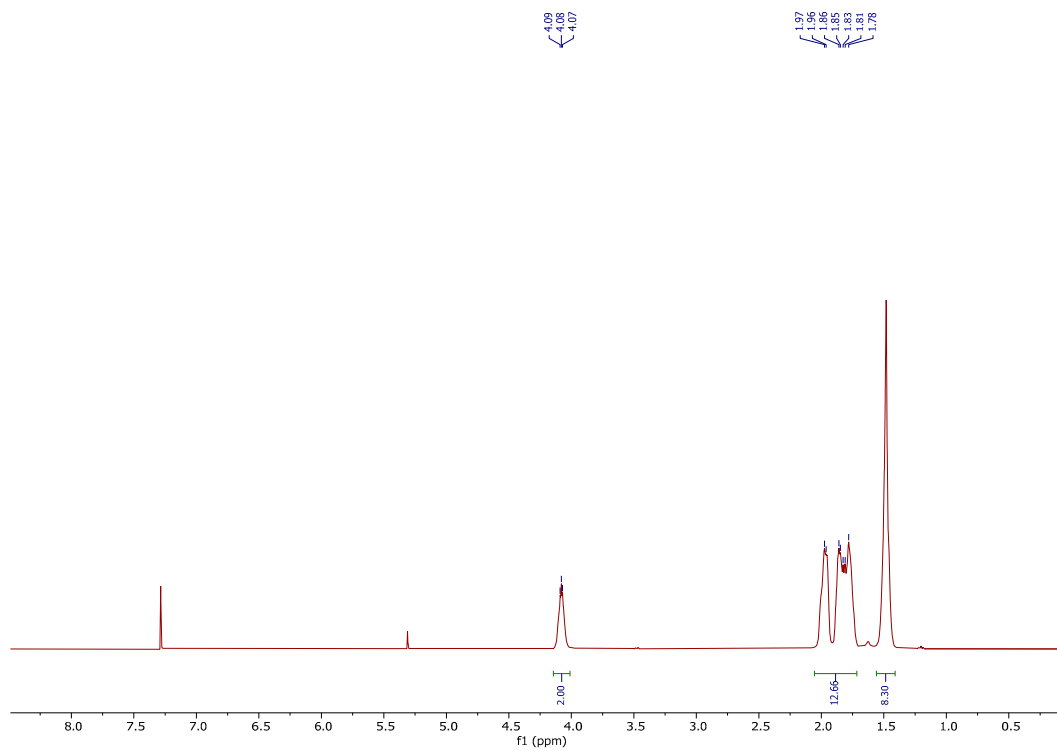

**Figure S21.** The  $^1\text{H}$  NMR spectra of  $[\text{PtBr}_2(\text{CNCy})_2]$  8.

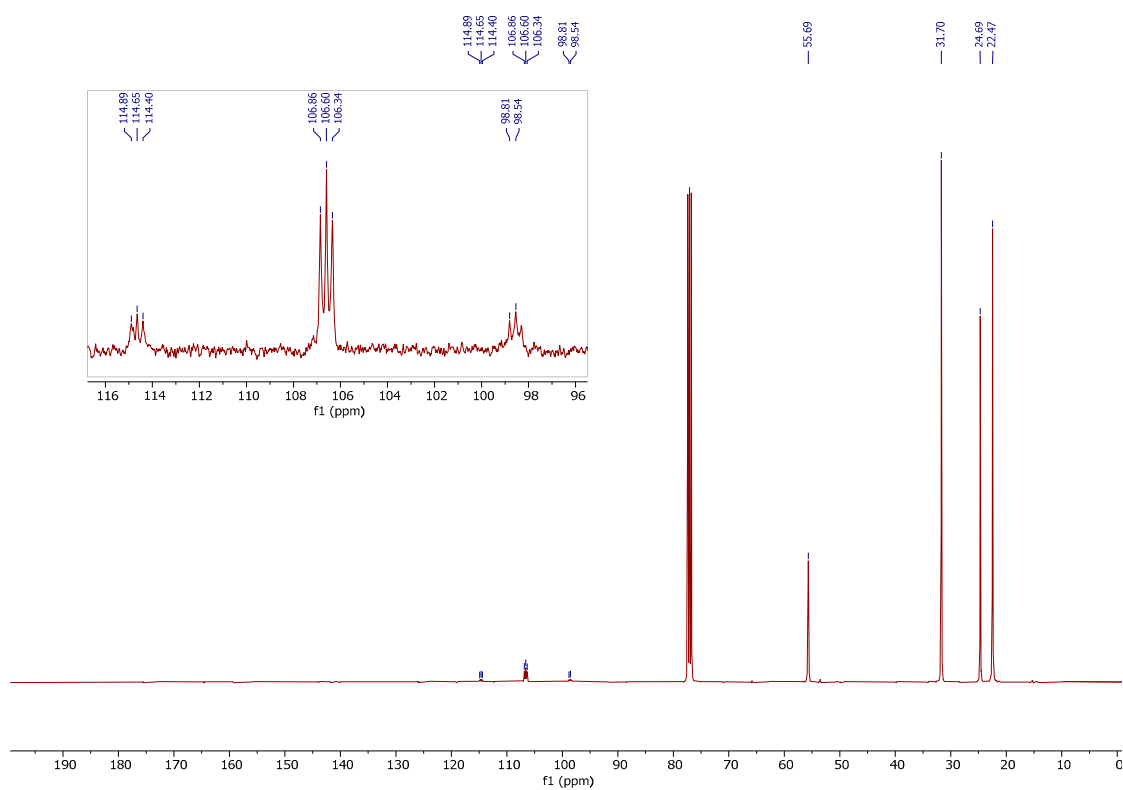

**Figure S22.** The  $^{13}\text{C}\{^1\text{H}\}$  NMR spectra of  $[\text{PtBr}_2(\text{CNCy})_2]$  **8**.

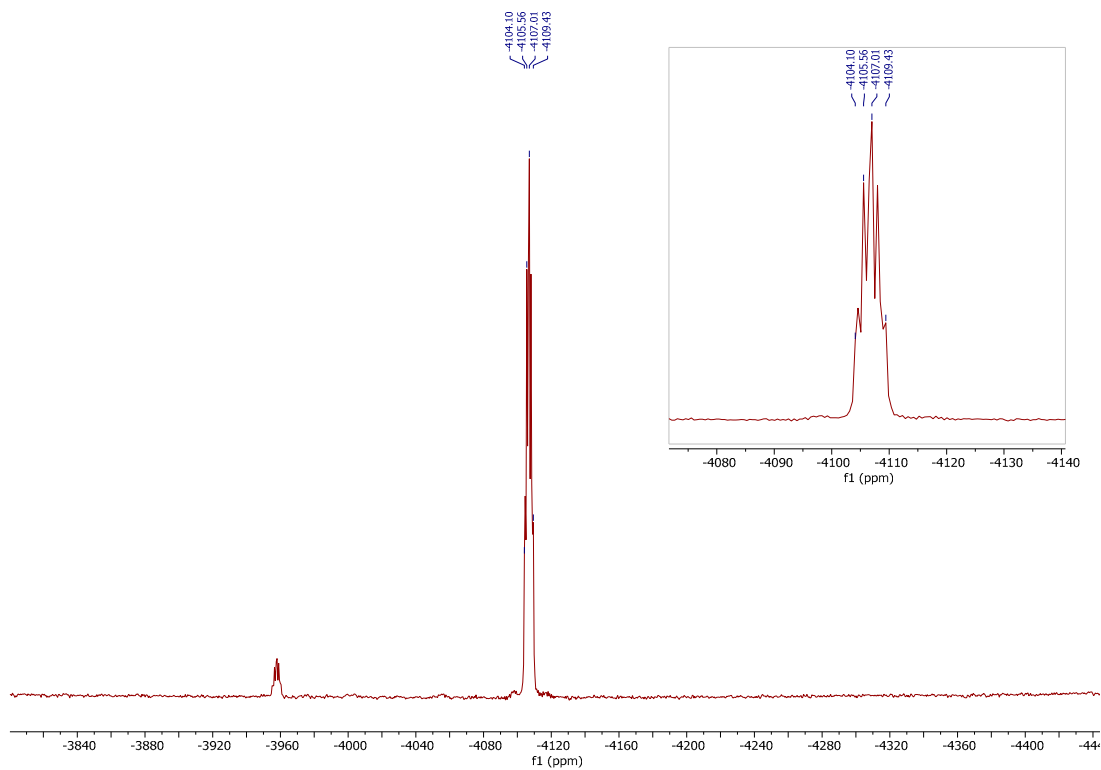

**Figure S23.** The  $^{195}\text{Pt}\{^1\text{H}\}$  NMR spectra of  $[\text{PtBr}_2(\text{CNCy})_2]$  **8**.

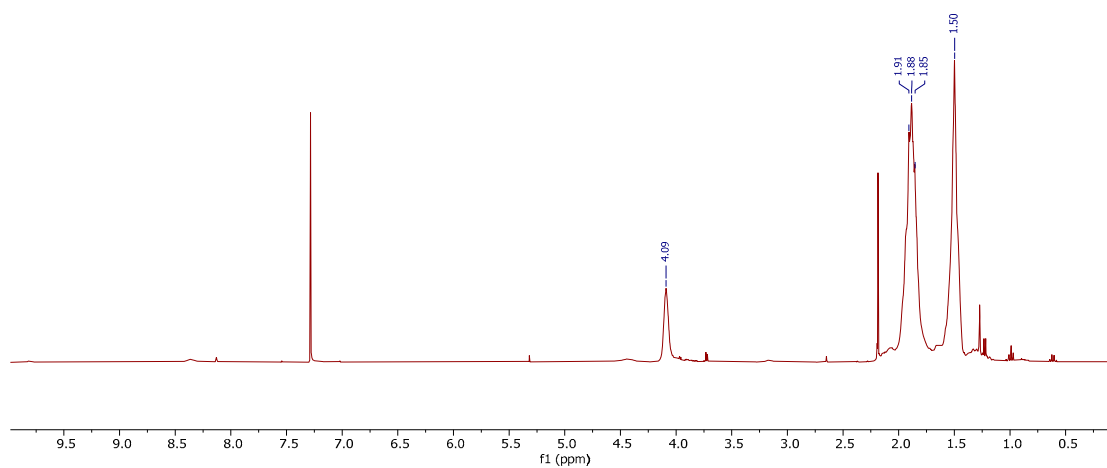

**Figure S24.** The  $^1\text{H}$  NMR spectra of  $[\text{PtI}_2(\text{CNCy})_2]$  **9**.

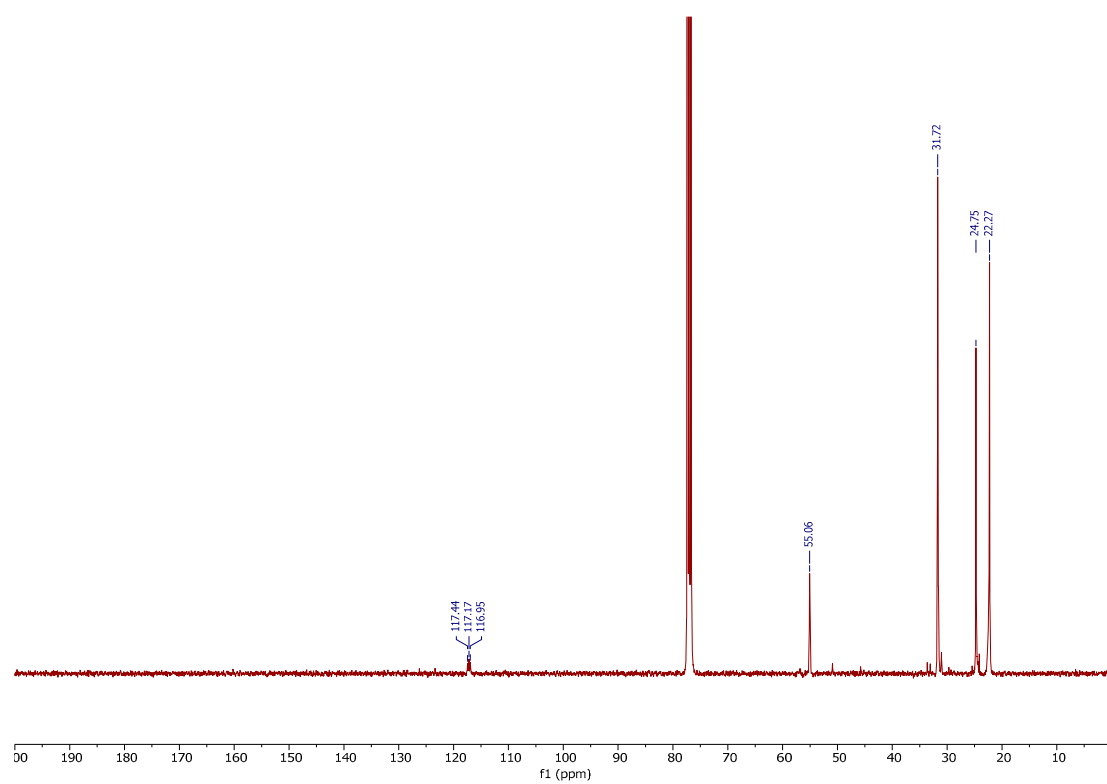

**Figure S25.** The  $^{13}\text{C}\{^1\text{H}\}$  NMR spectra of  $[\text{PtI}_2(\text{CNCy})_2]$  **9**.

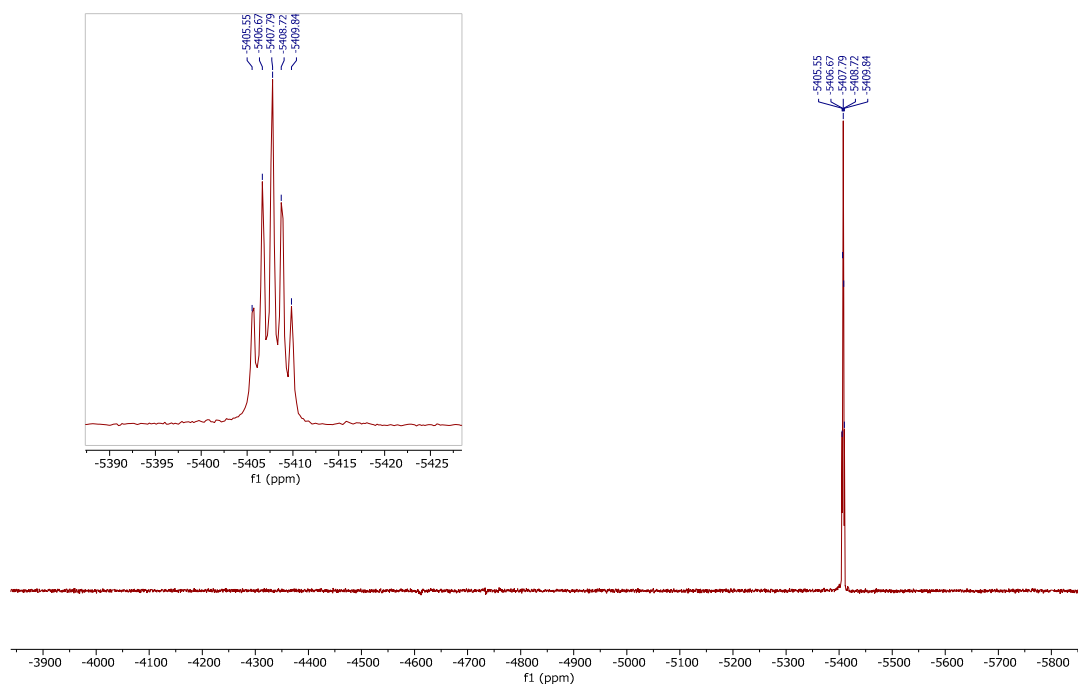

**Figure S26.** The  $^{195}\text{Pt}\{^1\text{H}\}$  NMR spectra of  $[\text{PtI}_2(\text{CNCy})_2]$  **9**.

## S8. FTIR spectra

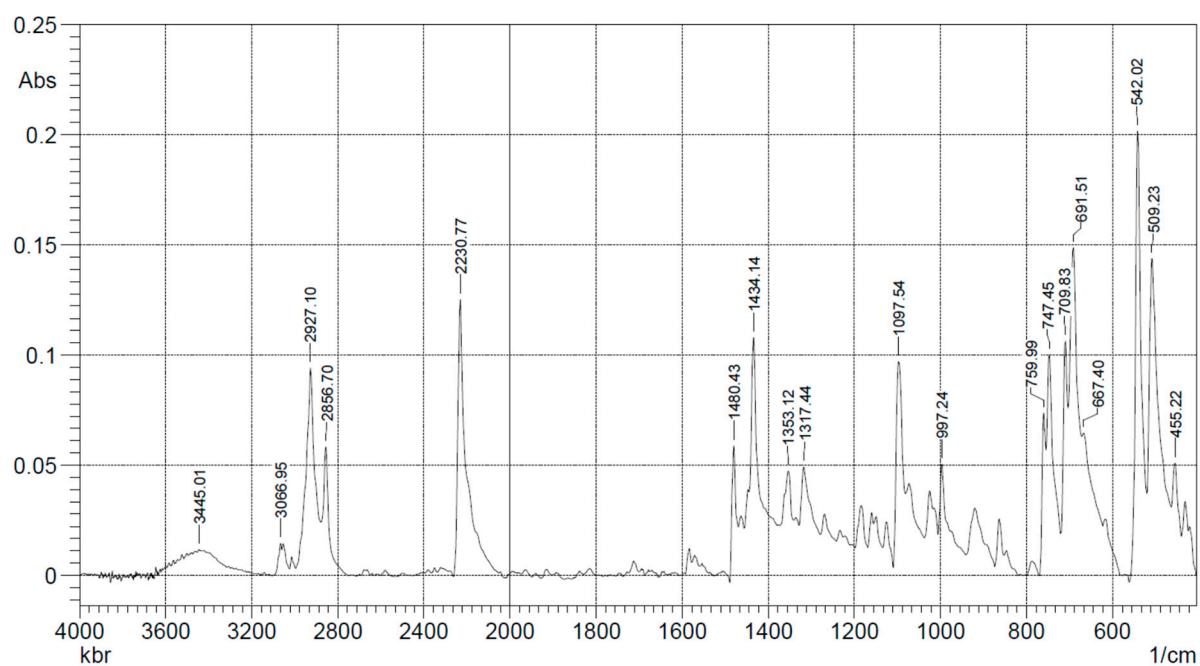

**Figure S27.** The FTIR spectra of [PtCl<sub>2</sub>(CNCy)(PPh<sub>3</sub>)<sub>2</sub>] 4.

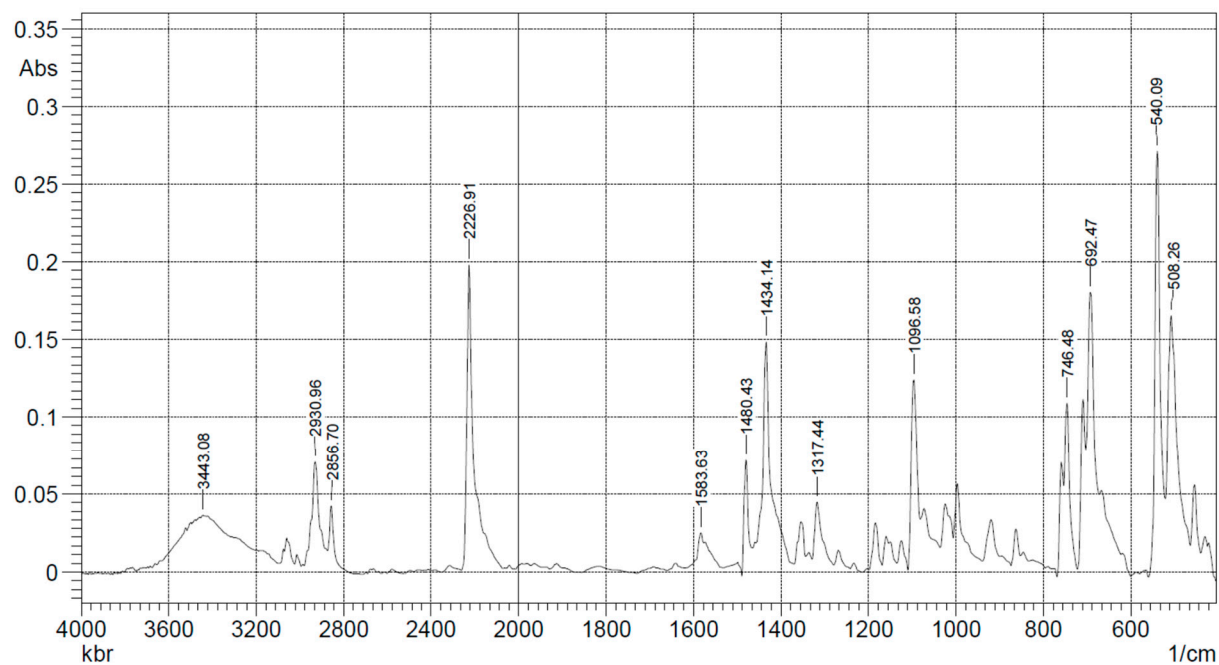

**Figure S28.** The FTIR spectra of [PtBr<sub>2</sub>(CNCy)(PPh<sub>3</sub>)<sub>2</sub>] 5.

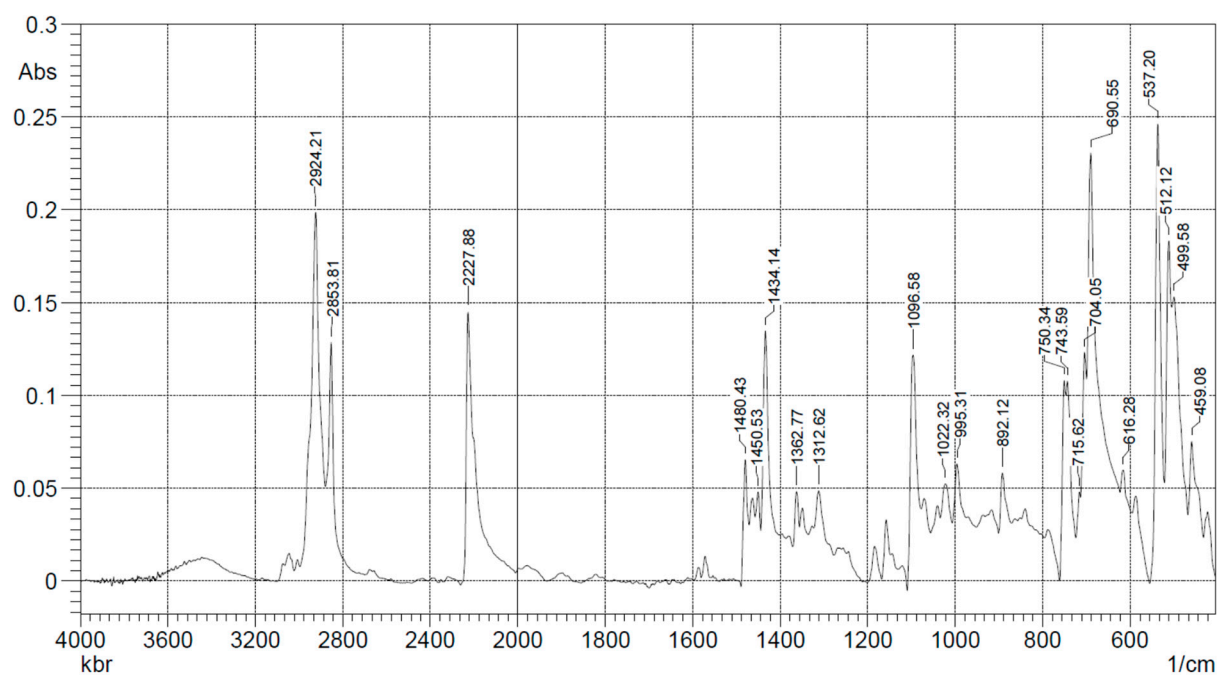

**Figure S29.** The FTIR spectra of  $[\text{PtI}_2(\text{CNCy})(\text{PPh}_3)_2]$  6.

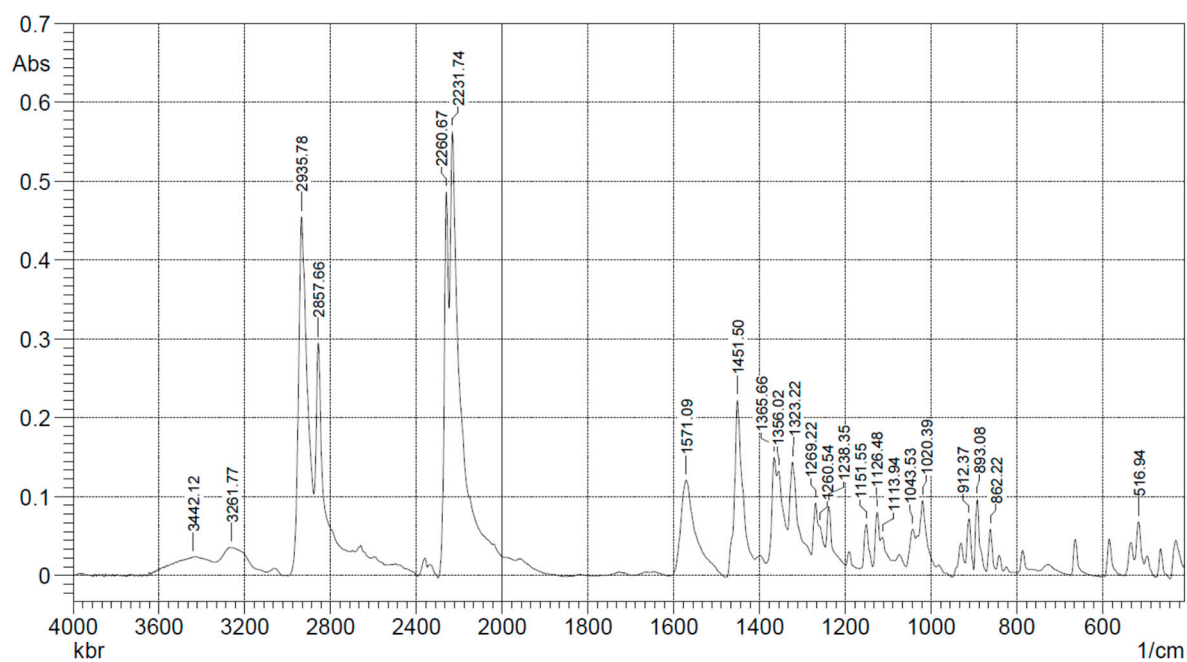

**Figure S30.** The FTIR spectra of  $[\text{PtBr}_2(\text{CNCy})_2]$  8.



## S9. Mass spectra

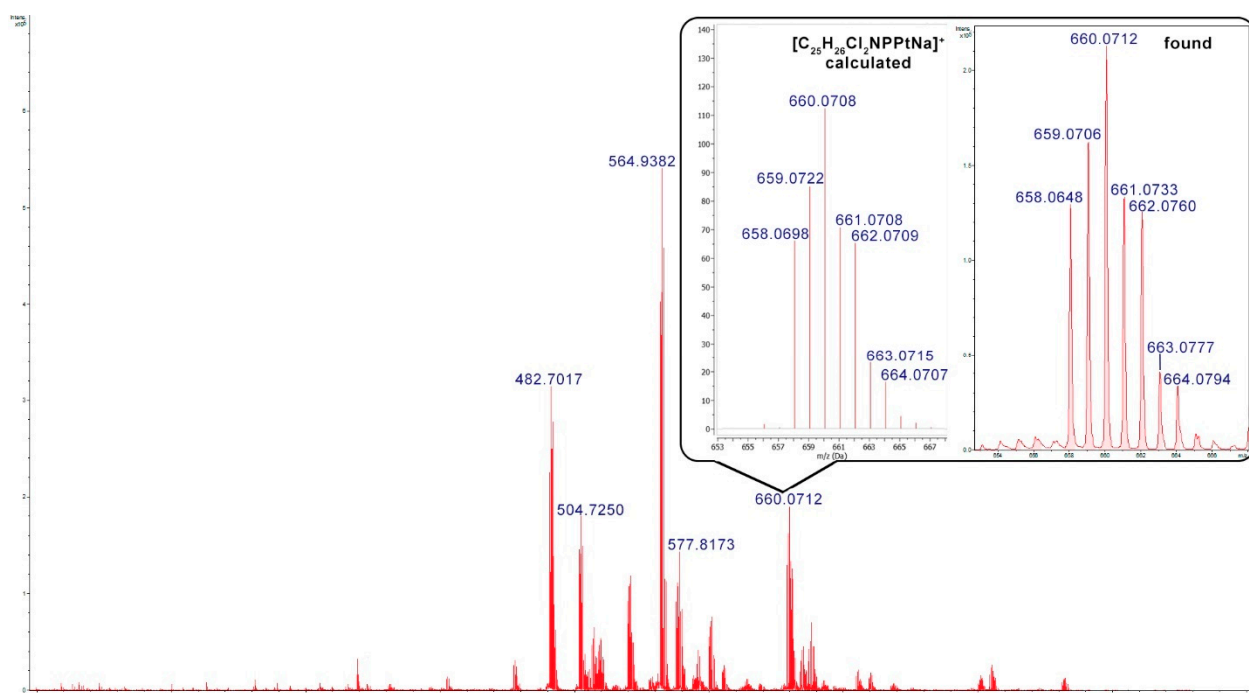

**Figure S31.** The mass spectra of  $[\text{PtCl}_2(\text{CNCy})(\text{PPh}_3)_2]$  4.

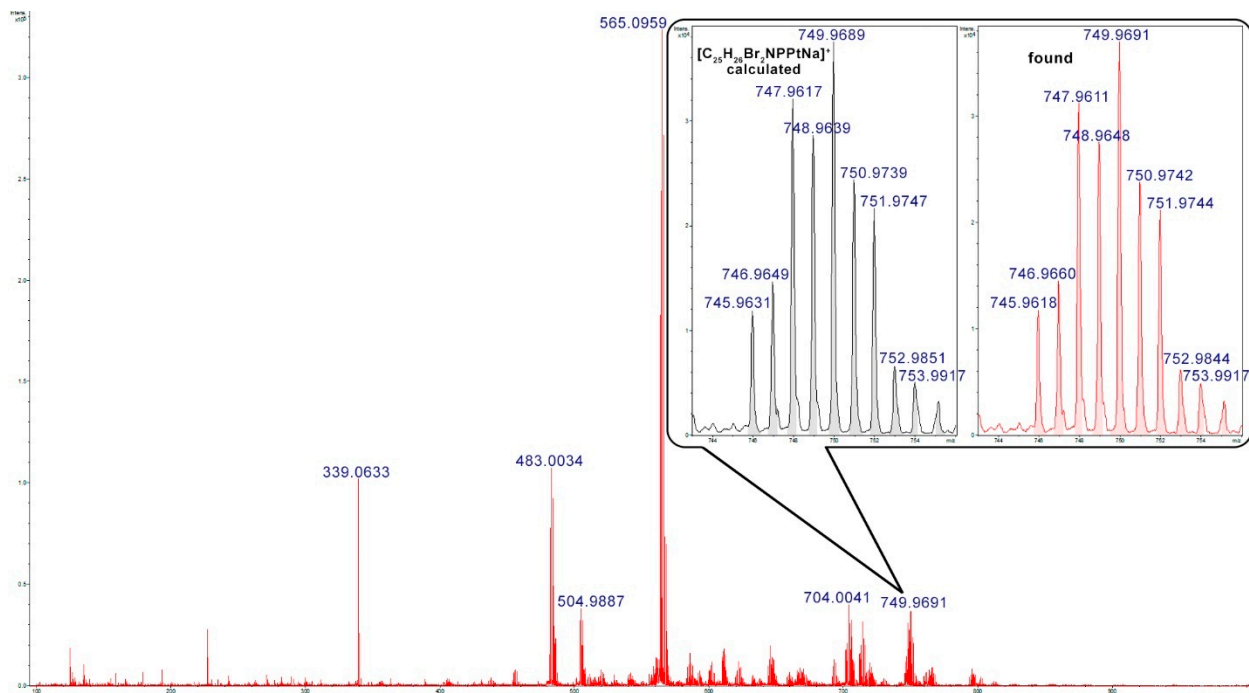

**Figure S32.** The mass spectra of  $[\text{PtBr}_2(\text{CNCy})(\text{PPh}_3)_2]$  5.

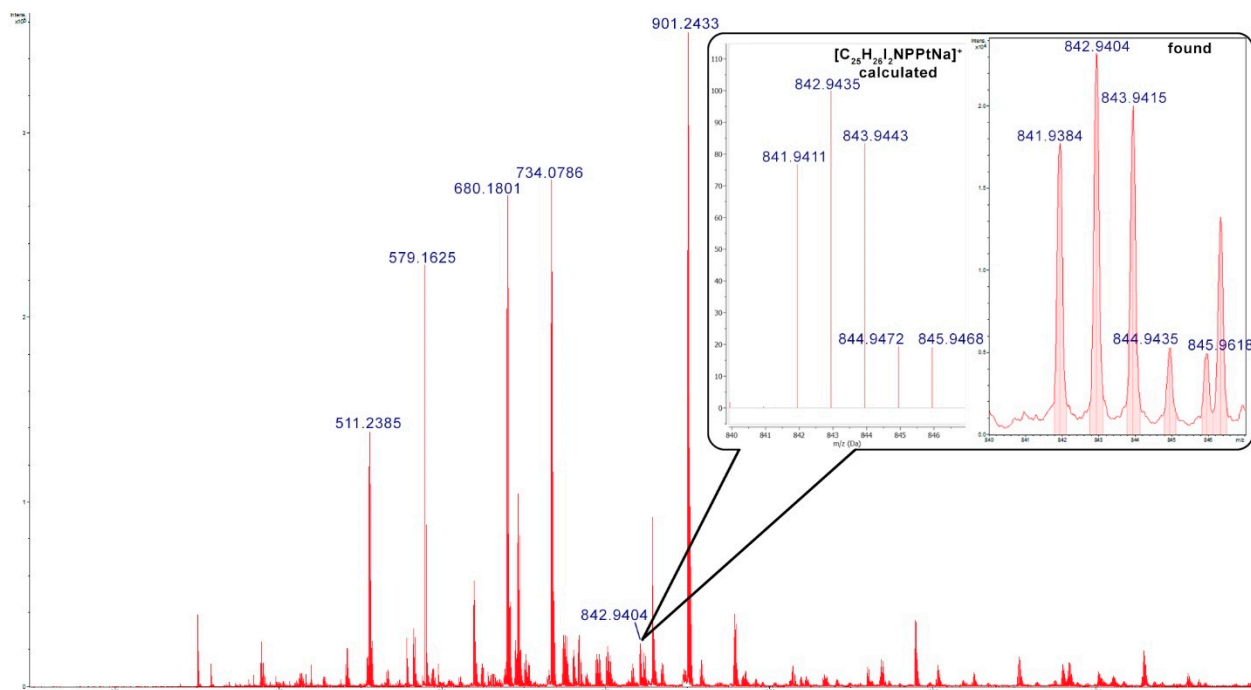

**Figure S33.** The mass spectra of  $[\text{PtI}_2(\text{CNCy})(\text{PPh}_3)_2]$  6.

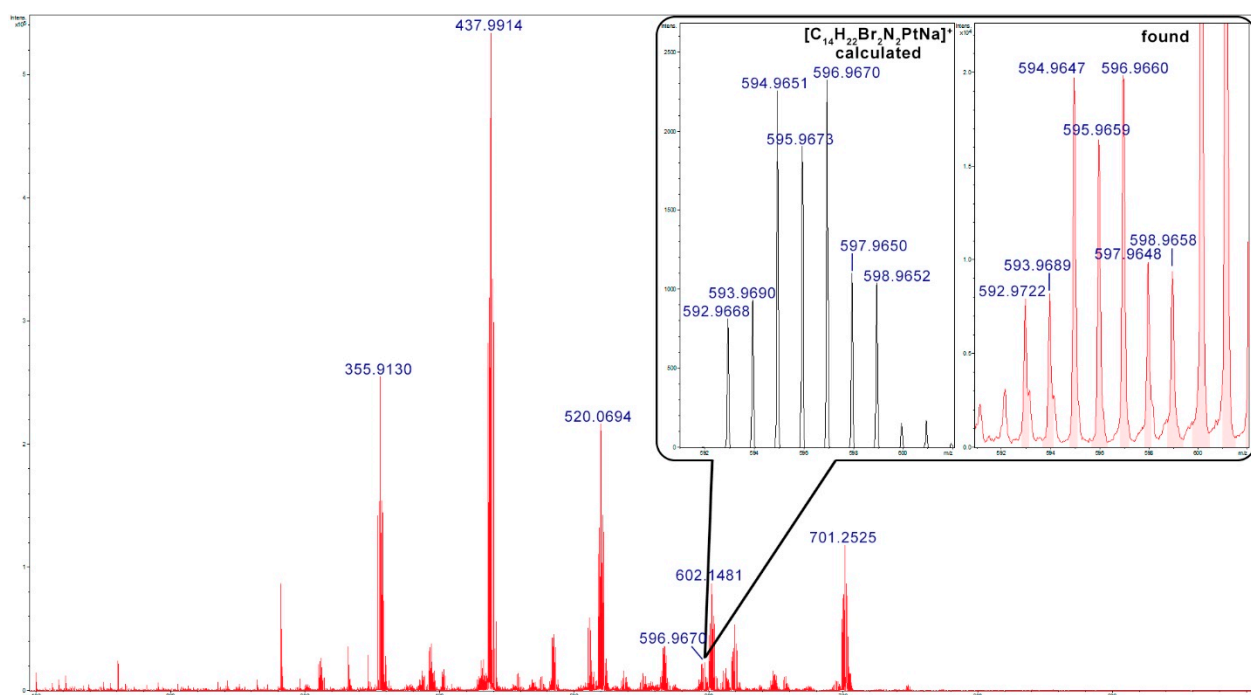

**Figure S34.** The mass spectra of  $[\text{PtBr}_2(\text{CNCy})_2]$  8.

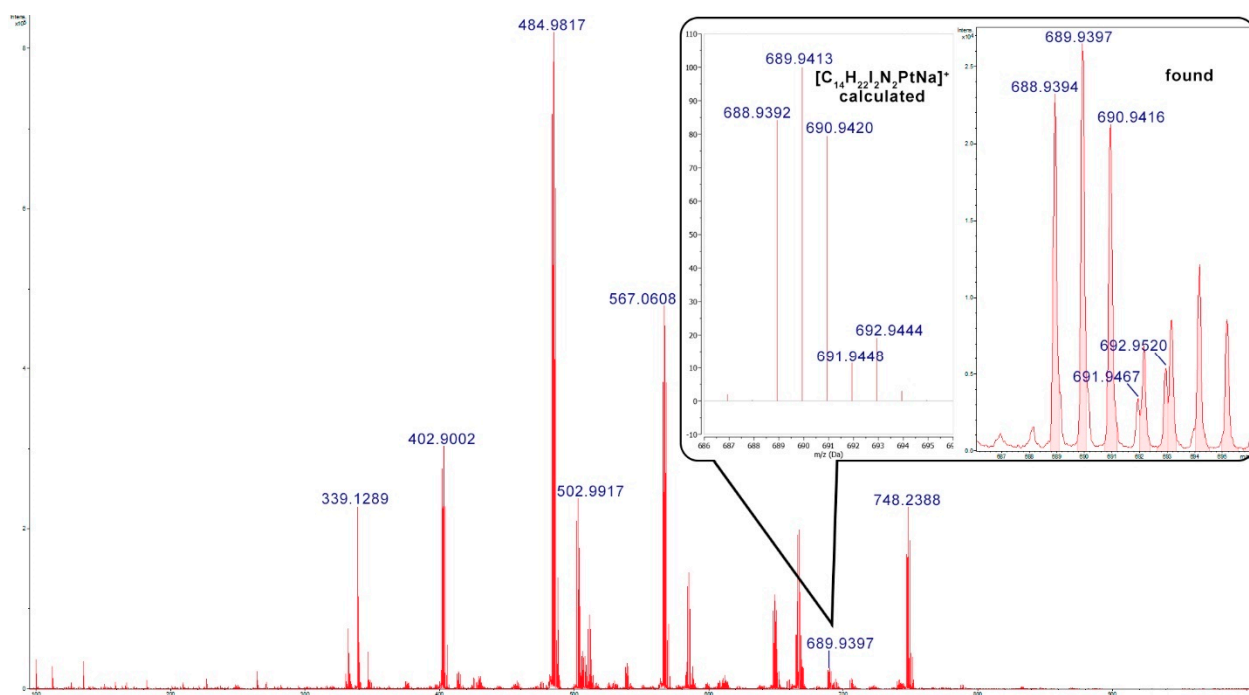

**Figure S35.** The mass spectra of  $[\text{PtI}_2(\text{CNCy})_2]$  9.

## References

1. Katkova, S.A., M.A. Kinzhalov, P.M. Tolstoy, A.S. Novikov, V.P. Boyarskiy, A.Y. Ananyan, P.V. Gushchin, M. Haukka, A.A. Zolotarev, A.Y. Ivanov, S.S. Zlotsky V.Y. Kukushkin, Diversity of Isomerization Patterns and Protolytic Forms in Aminocarbene PdII and PtII Complexes Formed upon Addition of N,N'-Diphenylguanidine to Metal-Activated Isocyanides. *Organometallics*, **2017**.
2. Tskhovrebov, A.G., K.V. Luzyanin, M. Haukka V.Y. Kukushkin, Synthesis and Characterization of cis-(RNC)2PtII Species Useful as Synthons for Generation of Various (Aminocarbene)PtII Complexes. *Journal of Chemical Crystallography*, **2012**, 42, pp. 1170-1175.
3. Rigamonti, L., C. Manassero, M. Rusconi, M. Manassero A. Pasini, cis Influence in trans-Pt(PPh3)2 complexes. *Dalton Trans.*, **2009**, pp. 1206–1213.
4. Rigamonti, L., A. Forni, M. Manassero, C. Manassero A. Pasini, Cooperation between Cis and Trans Influences in cis-PtII(PPh3)2 Complexes: Structural, Spectroscopic, and Computational Studies. *Inorg. Chem.*, **2010**, 49, pp. 123–135.
5. Kinzhalov, M.A., M.V. Kashina, A.S. Mikherdov, S.A. Katkova V.V. Suslonov, Synthesis of Platinum(II) Phosphine Isocyanide Complexes and Study of Their Stability in Isomerization and Ligand Disproportionation Reactions. *Russ. J. Gen. Chem.*, **2018**, 88, pp. 1180-1187.
6. Manojlovicmuir, L., K.W. Muir T. Solomun, CIS-INFLUENCE AND TRANS-INFLUENCE OF LIGANDS IN PLATINUM(II) COMPLEXES - CRYSTAL AND MOLECULAR-STRUCTURE OF CIS- PTCL2(PET3)(CO). *Journal of Organometallic Chemistry*, **1977**, 142, pp. 265-280.
7. Briggs, J.R., C. Crocker B.L. Shaw, COMPLEXES OF THE TYPE TRANS-PTCL2(PR3)(CNR') AND THE CARBENE COMPLEX TRANS- PTCL2(PR3)C(NHC6H4ME-4)2. *Inorganica Chimica Acta-Articles*, **1981**, 51, pp. 15-18.
8. Kinzhalov, M.A., M.V. Kashina, A.S. Mikherdov, E.A. Mozheeva, A.S. Novikov, A.S. Smirnov, D.M. Ivanov, M.A. Kryukova, A.Y. Ivanov, S.N. Smirnov, V.Y. Kukushkin K.V. Luzyanin, Dramatically Enhanced Solubility of Halide-Containing Organometallic Species in Diiodomethane: The Role of Solvent...Complex Halogen Bonding. *Angew. Chem. Int. Ed.*, **2018**, 57, pp. 12785–12789.
9. Zhang, B., K. Kurpiewska A. Dömling, Highly Stereoselective Ugi/Pictet–Spengler Sequence. *The Journal of Organic Chemistry*, **2022**, 87, pp. 7085-7096.
10. Katkova, S.A., K.V. Luzyanin, A.S. Novikov M.A. Kinzhalov, Modulation of luminescence properties for [cyclometalated]-PtII(isocyanide) complexes upon co-crystallisation with halosubstituted perfluorinated arenes. *New J. Chem.*, **2021**, 45, pp. 2948-2952.
11. Lu, Z.-l., A. Mayr K.-K. Cheung, Synthesis and formation of metal complexes of 4-alkynyl and 4-cyano-2,6-diisopropylphenylisocyanides. *Inorganica Chimica Acta*, **1999**, 284, pp. 205-214.
12. Sokolova, E.V., M.A. Kinzhalov, A.S. Smirnov, A.M. Cheranyova, D.M. Ivanov, V.Y. Kukushkin N.A. Bokach, Polymorph-Dependent Phosphorescence of Cyclometalated Platinum(II) Complexes and Its Relation to Non-covalent Interactions. *ACS Omega*, **2022**, 7, pp. 34454-34462.
13. Stephany, R.W., M.J.A. de Bie W. Drenth, A 13C-NMR and IR study of isocyanides and some of their complexes. *Organic Magnetic Resonance*, **1974**, 6, pp. 45–47.

14. Kinzhalov, M.A., K.V. Luzyanin, I.A. Boyarskaya, G.L. Starova V.P. Boyarskiy, Synthetic and structural investigation of  $\text{PdBr}_2(\text{CNR})(2)$  ( $\text{R} = \text{Cy}, \text{Xyl}$ ). *Journal of Molecular Structure*, **2014**, 1068, pp. 222-227.
15. Knorr, M., I. Jourdain, G. Crini, K. Frank, H. Sachdev C. Strohmann, Synthesis, Reactivity and Molecular Structures of Bis(diphenylphosphanyl)methane-Bridged Heterobimetallic Iron–Platinum Isocyanide Complexes: Breaking and Formation of Metal–Metal Bonds. *European Journal of Inorganic Chemistry*, **2002**, 2002, pp. 2419-2426.
16. Vicenzi, D., P. Sgarbossa, A. Biffis, C. Tubaro, M. Basato, R.A. Michelin, A. Lanza, F. Nestola, S. Bogialli, P. Pastore A. Venzo, Platinum(II) Complexes with Novel Diisocyanide Ligands: Catalysts in Alkyne Hydroarylation. *Organometallics*, **2013**, 32, pp. 7153-7162.
17. Kim, Y.-J., E.-H. Choi S.W. Lee, Reactivity of Bis(silyl) Platinum(II) Complexes toward Isocyanides: Preparation and Structure of  $\text{cis}[\text{Pt}(\text{SiHPh}_2)_2(\text{CNR})(\text{PR}'_3)]$  ( $\text{R} = \text{t-Bu}, \text{cyclohexyl}, \text{i-Pr}$ ;  $\text{R}' = \text{Me}, \text{Et}$ ). *Organometallics*, **2003**, 22, pp. 3316-3319.
18. Jameson, C.J., in *Multinuclear NMR*, J. Mason, Editor. 1987, Plenum Press: New York. p. 89–131.
19. Pidcock, A., R.E. Richards L.M. Venanzi, 195Pt-31P nuclear spin coupling constants and the nature of the trans-effect in platinum complexes. *J. Chem. Soc. A*, **1966**, pp. 1707-1710.
20. Sluch, I.M., A.J. Miranda L.M. Slaughter, Channeled Polymorphs of  $\text{cis-M}(\text{CNPh})_2\text{Cl}_2$  ( $\text{M} = \text{Pt}, \text{Pd}$ ) With Extended Metallophilic Interactions. *Crystal Growth & Design*, **2009**, 9, pp. 1267-1270.
21. Kashina, M.V., D.M. Ivanov M.A. Kinzhalov, The Isocyanide Complexes  $\text{cis}[\text{MCl}_2(\text{CNC}_6\text{H}_4\text{-4-X})_2]$  ( $\text{M} = \text{Pd}, \text{Pt}$ ;  $\text{X} = \text{Cl}, \text{Br}$ ) as Tectons in Crystal Engineering Involving Halogen Bonds. *Crystals*, **2021**, 11, pp. 799.
22. Harvey, P.D., K.D. Truong, K.T. Aye, M. Drouin A.D. Bandrauk, Resonance-Enhanced Intraligand and Metal-Metal Raman Modes in Weakly Metal-Metal-Interacting Platinum(II) Complexes and Long-Range Relationship between Metal-Metal Separations and Force Constants. *Inorganic Chemistry*, **1994**, 33, pp. 2347-2354.
23. Barnett, B.R., C.E. Moore, A.L. Rheingold J.S. Figueroa, Cooperative Transition Metal/Lewis Acid Bond-Activation Reactions by a Bidentate (Boryl)iminomethane Complex: A Significant Metal–Borane Interaction Promoted by a Small Bite-Angle LZ Chelate. *Journal of the American Chemical Society*, **2014**, 136, pp. 10262-10265.
24. Sluch, I.M., A.J. Miranda, O. Elbjeirami, M.A. Omary L.M. Slaughter, Interplay of Metallophilic Interactions,  $\pi$ – $\pi$  Stacking, and Ligand Substituent Effects in the Structures and Luminescence Properties of Neutral PtII and PdII Aryl Isocyanide Complexes. *Inorg. Chem.*, **2012**, 51, pp. 10728-10746.
25. Kinzhalov, M.A., M.V. Kashina, A.S. Mikherdov, S.A. Katkova V.V. Suslonov, Synthesis of Platinum(II) Phoshine Isocyanide Complexes and Study of Their Stability in Isomerization and Ligand Disproportionation Reactions. *Russian Journal of General Chemistry*, **2018**, 88, pp. 1180-1187.
26. Vicente, J., A. Arcas, J.M. Fernández-Hernández, G. Aullón D. Bautista, Acetonyl Platinum(II) Complexes. *Organometallics*, **2007**, 26, pp. 6155-6169.
27. Hubbert, C., M. Breunig, K.J. Carroll, F. Rominger A.S.K. Hashmi, Simple Synthesis of New Mixed Isocyanide-NHC-Platinum(II) Complexes and Their Catalytic Activity. *Australian Journal of Chemistry*, **2014**, 67, pp. 469-469.
28. Bulatova, M., D.M. Ivanov, J.M. Rautiainen, M.A. Kinzhalov, K.-N. Truong, M. Lahtinen M. Haukka, Studies of Nature of Uncommon Bifurcated  $\text{I}\cdots\text{I}\cdots(\text{I}-\text{M})$  Metal-Involving Noncovalent Interaction in Palladium(II) and Platinum(II) Isocyanide Cocrystals. *Inorg. Chem.*, **2021**, 60, pp. 13200–13211.

29. Mayr, A., S. Wang, K.-K. CheungM. Hong, Synthesis, structure, and liquid crystal properties of a series of platinum(II) complexes containing chiral 4-(4-alkoxyphenylethynyl) phenylisocyanide ligands. *Journal of Organometallic Chemistry*, **2003**, 684, pp. 287-299.
30. Wang, S., A. MayrK.-k. Cheung, Mesogenic palladium and platinum-diiodide complexes of 4-isocyanobenzylidene-4-alkoxyphenylimines. *Journal of Materials Chemistry*, **1998**, 8, pp. 1561-1565.
31. Kashina, M.V., M.A. Kinzhalov, A.S. Smirnov, D.M. Ivanov, A.S. NovikovV.Y. Kukushkin, Dihalomethanes as Bent Bifunctional XB/XB-Donating Building Blocks for Construction of Metal-involving Halogen Bonded Hexagons. *Chem.: Asian J.*, **2019**, 14, pp. 3915-3920.
32. Kaharu, T., T. Tanaka, M. SawadaS. Takahashi, Liquid-crystalline palladium- and platinum-isonitrile complexes: synthesis, mesomorphic properties and molecular structure. *J. Mater. Chem.*, **1994**, 4, pp. 859-865.
33. Yamamoto, Y., T. HagiwaraH. Yamazaki, Axially dissymmetric 2,2'-diisocyano-1,1'-binaphthyl and its platinum complexes. *Inorganica Chimica Acta*, **1986**, 115, pp. L35-L37.
